# Supplementary material for: Enzymatic modular assembly of hybrid Lewis antigens
Source: Royal Society of Chemistry journal article supplement (doi:10.1039/d1ob01579f), 2021-01-01

## Supporting Information

For

### Enzymatic modular assembly of hybrid Lewis antigens

Hui Xia,<sup>a</sup> Jinfeng Ye,<sup>bc</sup> Hongzhi Cao,<sup>abc</sup> Xianwei Liu,<sup>a</sup> Yan Zhang,<sup>\*d</sup> and

Chang-Cheng Liu<sup>\*ab</sup>

<sup>a</sup> *National Glycoengineering Research Center, NMPA Key Laboratory for Quality Research and Evaluation of Carbohydrate-Based Medicine, and Shandong Key Laboratory of Carbohydrate Chemistry and Glycobiology, Shandong University, Qingdao 266237, China.  
E-mail: ccliu@sdu.edu.cn*

<sup>b</sup> *Laboratory for Marine Drugs and Bioproducts, Pilot National Laboratory for Marine Science and Technology (Qingdao), Qingdao 266237, China.*

<sup>c</sup> *Key Laboratory of Marine Drugs of Ministry of Education, Shandong Key Laboratory of Glycoscience and Glycotechnology, School of Medicine and Pharmacy, Ocean University of China, Qingdao 266003, China.*

<sup>d</sup> *Department of Pharmacy, Qilu Hospital of Shandong University, Jinan 250012, China.  
E-mail: zhangyansdu@email.sdu.edu.cn*

# 1 NMR assignment of final products 1, 2, and 3.

## 1.1 NMR assignment data for final products

NMR signals were assigned on the basis of  $^1\text{H}$  NMR,  $^{13}\text{C}$  NMR, COSY (Correlated Spectroscopy), HMBC (Heteronuclear Multiple Bond Correlation), HSQC ( $^1\text{H}$ - $^{13}\text{C}$  Heteronuclear Single Quantum Coherence), and HSQC-TOCSY (Heteronuclear Single Quantum Coherence-Total Correlation Spectroscopy) experiments.

### NMR assignment of compound 1

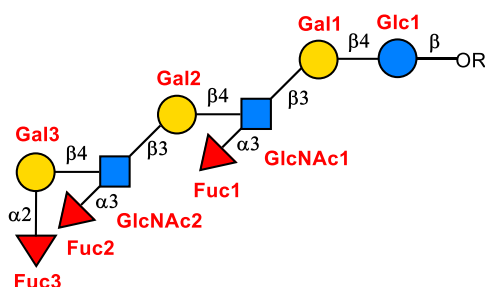

|         | H1   | H2   | H3   | H4   | H5                 | H6         | NAc              | Anomeric Carbon |
|---------|------|------|------|------|--------------------|------------|------------------|-----------------|
| Glc1    | 4.48 | 3.31 | 3.64 | 3.64 | 3.86               | 3.97, 3.79 | - <sup>[a]</sup> | 101.99          |
| Gal1    | 4.43 | 3.57 | 3.70 | 4.15 | N/A <sup>[b]</sup> | N/A        | -                | 102.81          |
| Gal2    | 4.44 | 3.51 | 3.68 | 4.09 | N/A                | N/A        | -                | 101.60          |
| Gal3    | 4.51 | 3.65 | 3.85 | 3.86 | N/A                | N/A        | -                | 100.06          |
| GlcNAc1 | 4.71 | 3.95 | 3.59 | 3.92 | N/A                | 3.95, 3.85 | 2.02             | 102.42          |
| GlcNAc2 | 4.71 | 3.95 | 3.57 | 3.94 | N/A                | 3.98, 3.83 | 2.02             | 102.33          |
| Fuc1    | 5.11 | 3.69 | 3.90 | 3.77 | 4.81               | 1.14       | -                | 98.60           |
| Fuc2    | 5.12 | 3.69 | 3.90 | 3.81 | 4.88               | 1.23       | -                | 98.49           |
| Fuc3    | 5.27 | 3.79 | 3.78 | 3.82 | 4.25               | 1.26       | -                | 99.30           |

<sup>[a]</sup> Not applicable

<sup>[b]</sup> Not assigned

| Linker | <u>O</u> CH <sub>2</sub> CH <sub>2</sub> CH <sub>2</sub> N <sub>3</sub> | OCH <sub>2</sub> <u>C</u> H <sub>2</sub> CH <sub>2</sub> N <sub>3</sub> | OCH <sub>2</sub> CH <sub>2</sub> <u>C</u> H <sub>2</sub> N <sub>3</sub> |
|--------|-------------------------------------------------------------------------|-------------------------------------------------------------------------|-------------------------------------------------------------------------|
| C      | 67.25                                                                   | 28.11                                                                   | 47.75                                                                   |
| H      | 4.00, 3.76                                                              | 1.91                                                                    | 3.46                                                                    |

## NMR assignment of compound 2

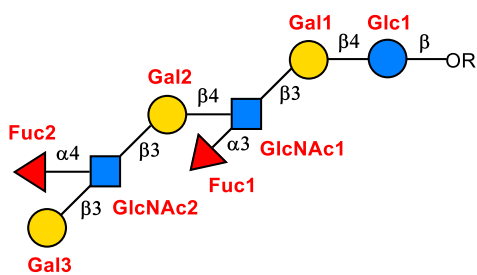

|         | H1   | H2   | H3   | H4   | H5                 | H6         | NAc              | Anomeric Carbon |
|---------|------|------|------|------|--------------------|------------|------------------|-----------------|
| Glc1    | 4.45 | 3.27 | 3.60 | 3.60 | 3.54               | 3.94, 3.76 | - <sup>[a]</sup> | 101.99          |
| Gal1    | 4.39 | 3.54 | 3.67 | 4.06 | N/A <sup>[b]</sup> | N/A        | -                | 102.80          |
| Gal2    | 4.40 | 3.47 | 3.67 | 4.12 | N/A                | N/A        | -                | 101.63          |
| Gal3    | 4.48 | 3.44 | 3.58 | 3.84 | N/A                | N/A        | -                | 102.74          |
| GlcNAc1 | 4.67 | 3.93 | 3.54 | 3.91 | N/A                | N/A        | 1.99 or 1.98     | 102.42          |
| GlcNAc2 | 4.65 | 3.92 | 4.03 | 3.70 | 3.50               | N/A        | 1.99 or 1.98     | 102.48          |
| Fuc1    | 5.08 | 3.65 | 3.85 | 3.75 | 4.78               | 1.11       | -                | 98.60           |
| Fuc2    | 4.99 | 3.76 | 3.86 | 3.75 | 4.85               | 1.14       | -                | 97.87           |

<sup>[a]</sup> Not applicable

<sup>[b]</sup> Not assigned

| Linker | <u>O</u> CH <sub>2</sub> CH <sub>2</sub> CH <sub>2</sub> N <sub>3</sub> | OCH <sub>2</sub> <u>C</u> H <sub>2</sub> CH <sub>2</sub> N <sub>3</sub> | OCH <sub>2</sub> CH <sub>2</sub> <u>C</u> H <sub>2</sub> N <sub>3</sub> |
|--------|-------------------------------------------------------------------------|-------------------------------------------------------------------------|-------------------------------------------------------------------------|
| C      | 67.23                                                                   | 28.07                                                                   | 47.72                                                                   |
| H      | 3.96, 3.72                                                              | 1.87                                                                    | 3.42                                                                    |

### NMR assignment of compound 3

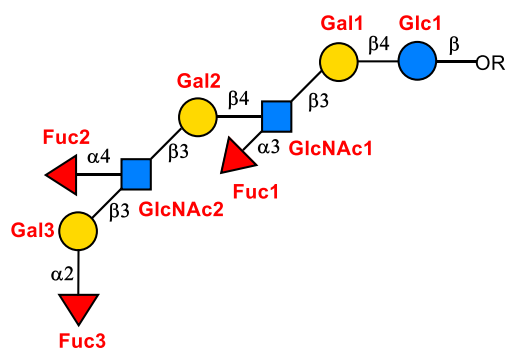

|         | H1   | H2   | H3   | H4   | H5                 | H6        | NAc          | Anomeric Carbon |
|---------|------|------|------|------|--------------------|-----------|--------------|-----------------|
| Glc1    | 4.44 | 3.26 | 3.59 | 3.59 | 3.53               | 3.93,3.74 | -[a]         | 101.96          |
| Gal1    | 4.38 | 3.52 | 3.65 | 4.10 | N/A <sup>[b]</sup> | N/A       | -            | 102.78          |
| Gal2    | 4.38 | 3.42 | 3.65 | 4.03 | N/A                | N/A       | -            | 101.59          |
| Gal3    | 4.61 | 3.56 | 3.76 | 3.81 | N/A                | N/A       |              | 100.45          |
| GlcNAc1 | 4.66 | 3.90 | 3.81 | 3.89 | N/A                | N/A       | 2.00 or 1.97 | 102.39          |
| GlcNAc2 | 4.55 | 3.78 | 4.08 | 3.68 | 3.52               | N/A       | 2.00 or 1.97 | 103.07          |
| Fuc1    | 5.06 | 3.64 | 3.82 | 3.72 | 4.77               | 1.10      | -            | 98.66           |
| Fuc2    | 5.00 | 3.75 | 3.86 | 3.77 | 4.82               | 1.21      | -            | 97.61           |
| Fuc3    | 5.10 | 3.69 | 3.63 | 3.66 | 4.29               | 1.22      | -            | 99.38           |

<sup>[a]</sup> Not applicable

<sup>[b]</sup> Not assigned

| Linker | <u>O</u> CH <sub>2</sub> CH <sub>2</sub> CH <sub>2</sub> N <sub>3</sub> | OCH <sub>2</sub> <u>C</u> H <sub>2</sub> CH <sub>2</sub> N <sub>3</sub> | OCH <sub>2</sub> CH <sub>2</sub> <u>C</u> H <sub>2</sub> N <sub>3</sub> |
|--------|-------------------------------------------------------------------------|-------------------------------------------------------------------------|-------------------------------------------------------------------------|
| C      | 67.22                                                                   | 28.08                                                                   | 47.72                                                                   |
| H      | 3.95, 3.71                                                              | 1.86                                                                    | 3.41                                                                    |

# <sup>1</sup>H NMR of compound 1

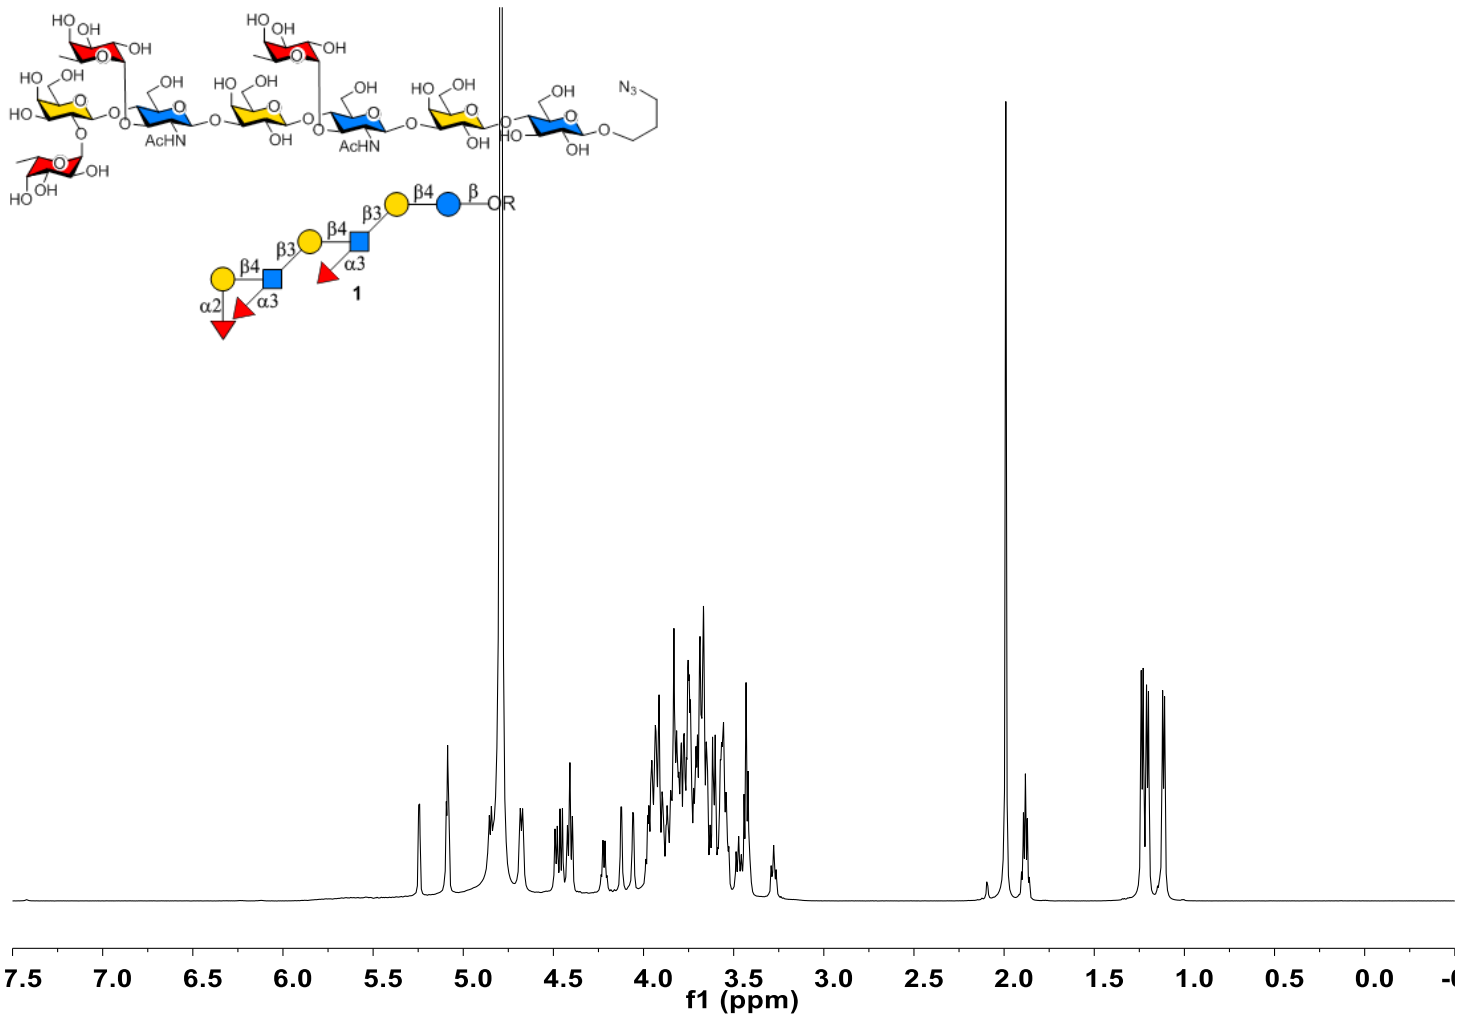

# $^{13}\text{C}$ NMR of compound 1

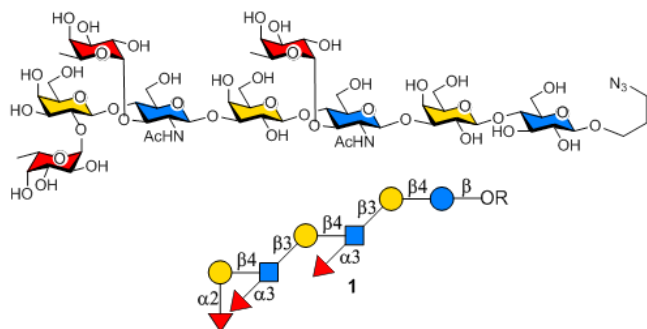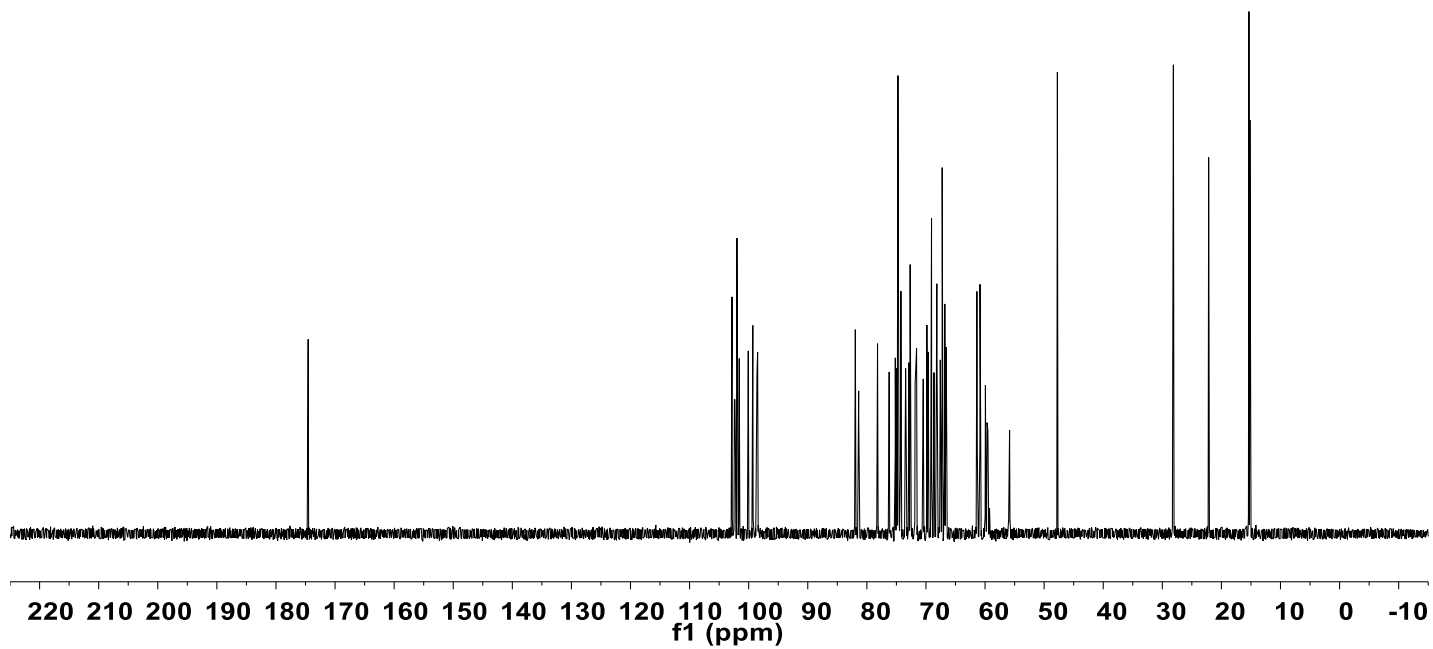

# COSY NMR of compound 1

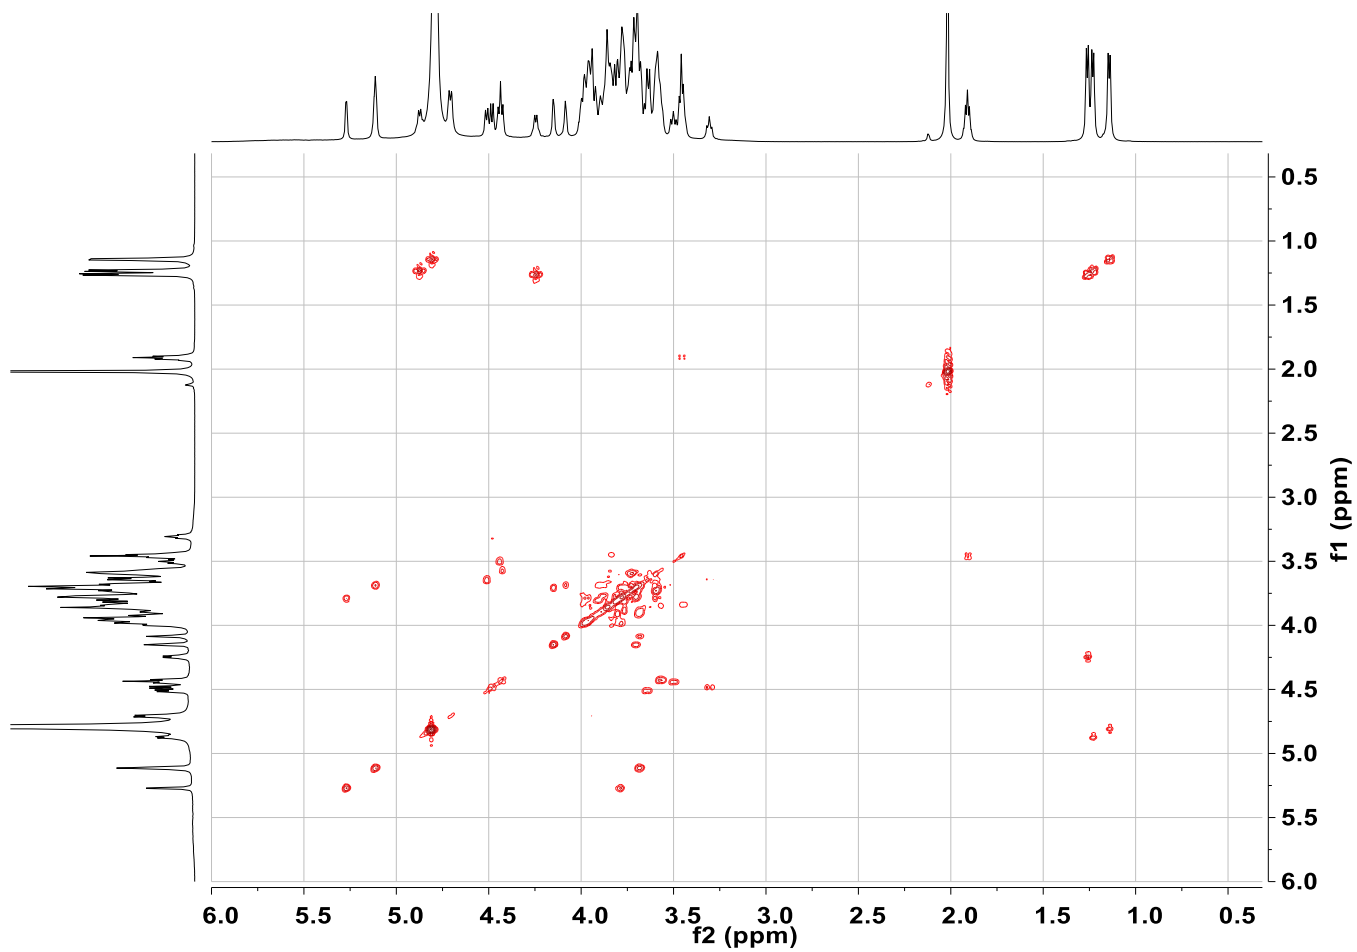

HSQC NMR of compound 1

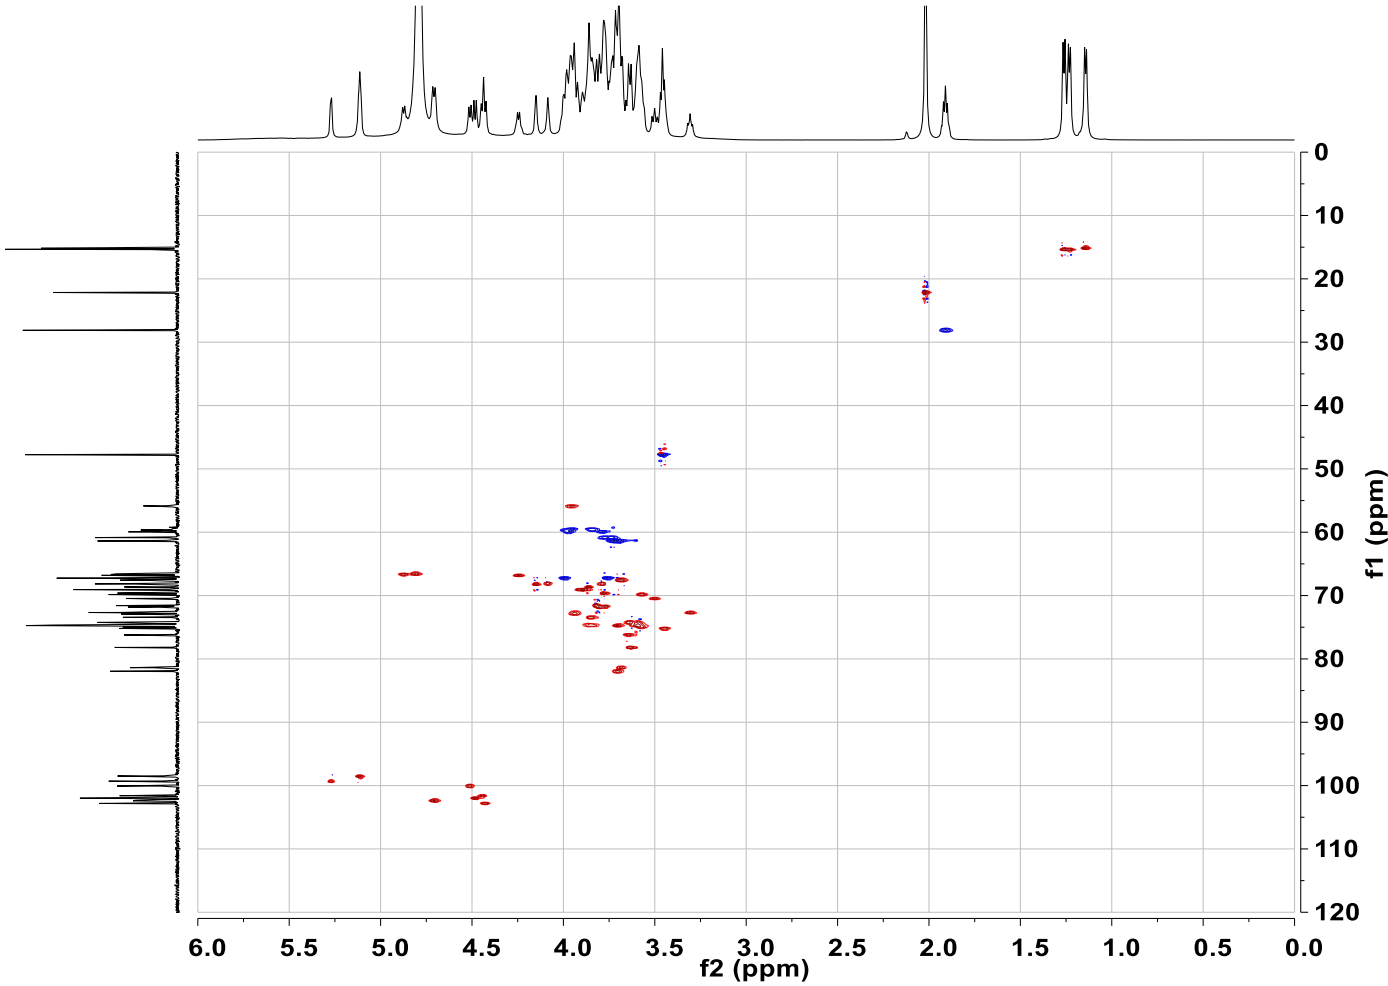



HMBC NMR of compound 1

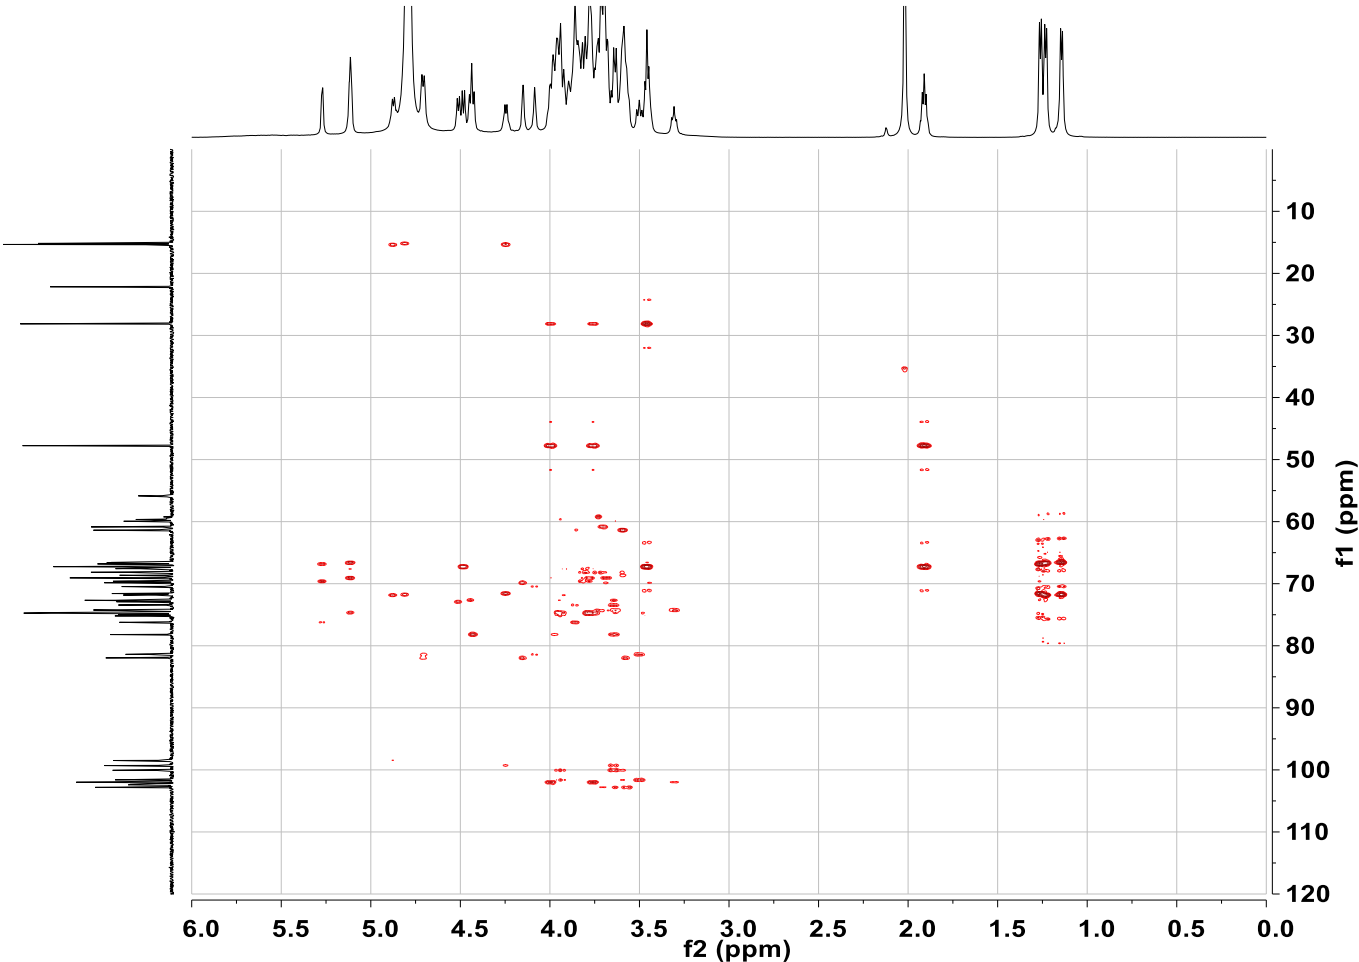

**HSQC-TOCSY NMR of compound 1**

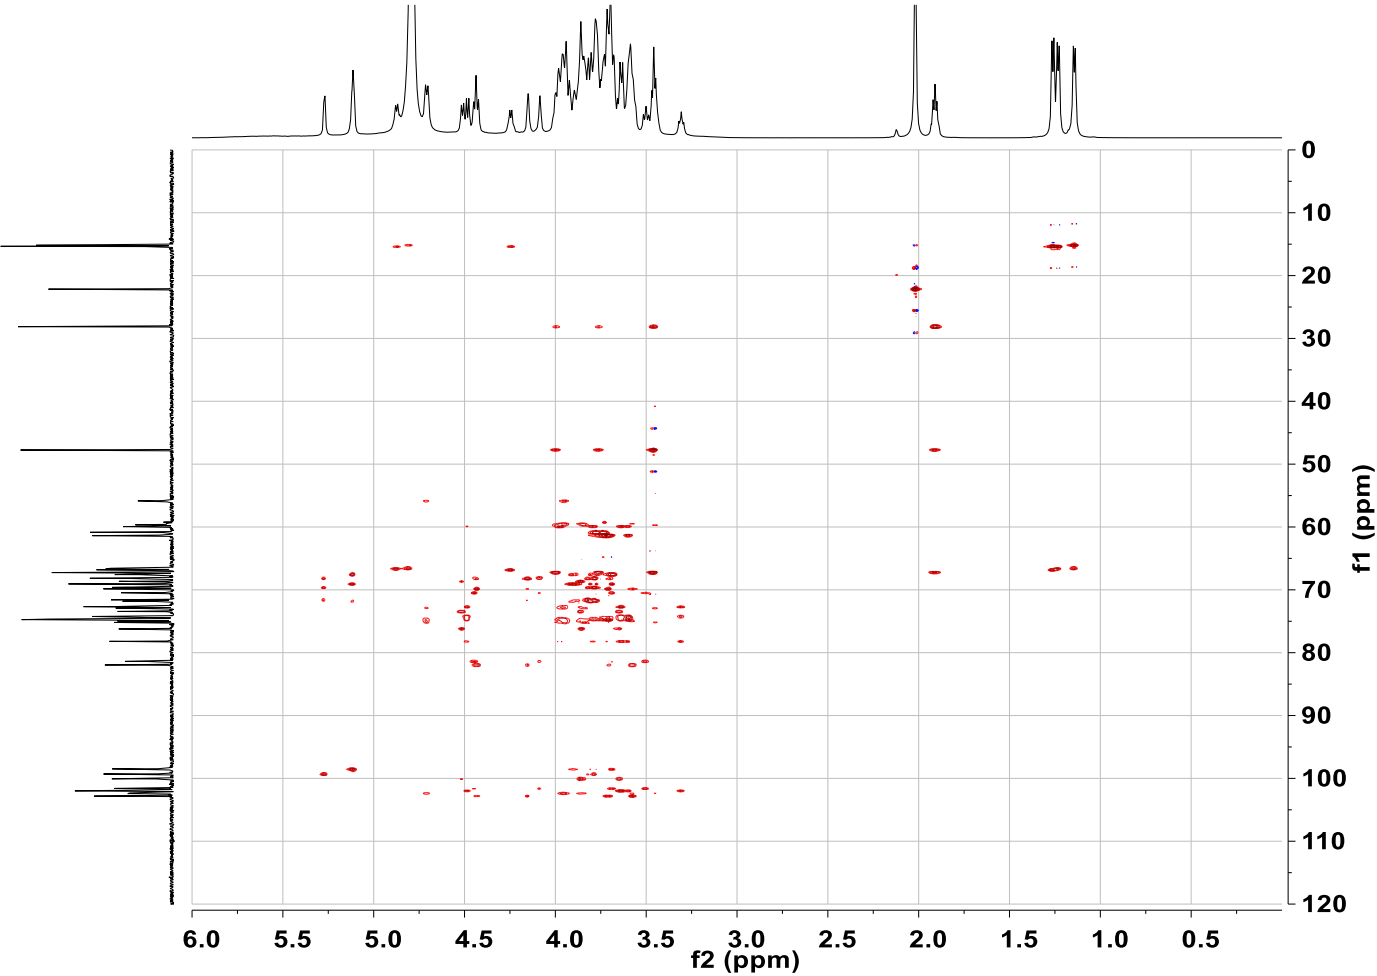

# <sup>1</sup>H NMR of compound 2

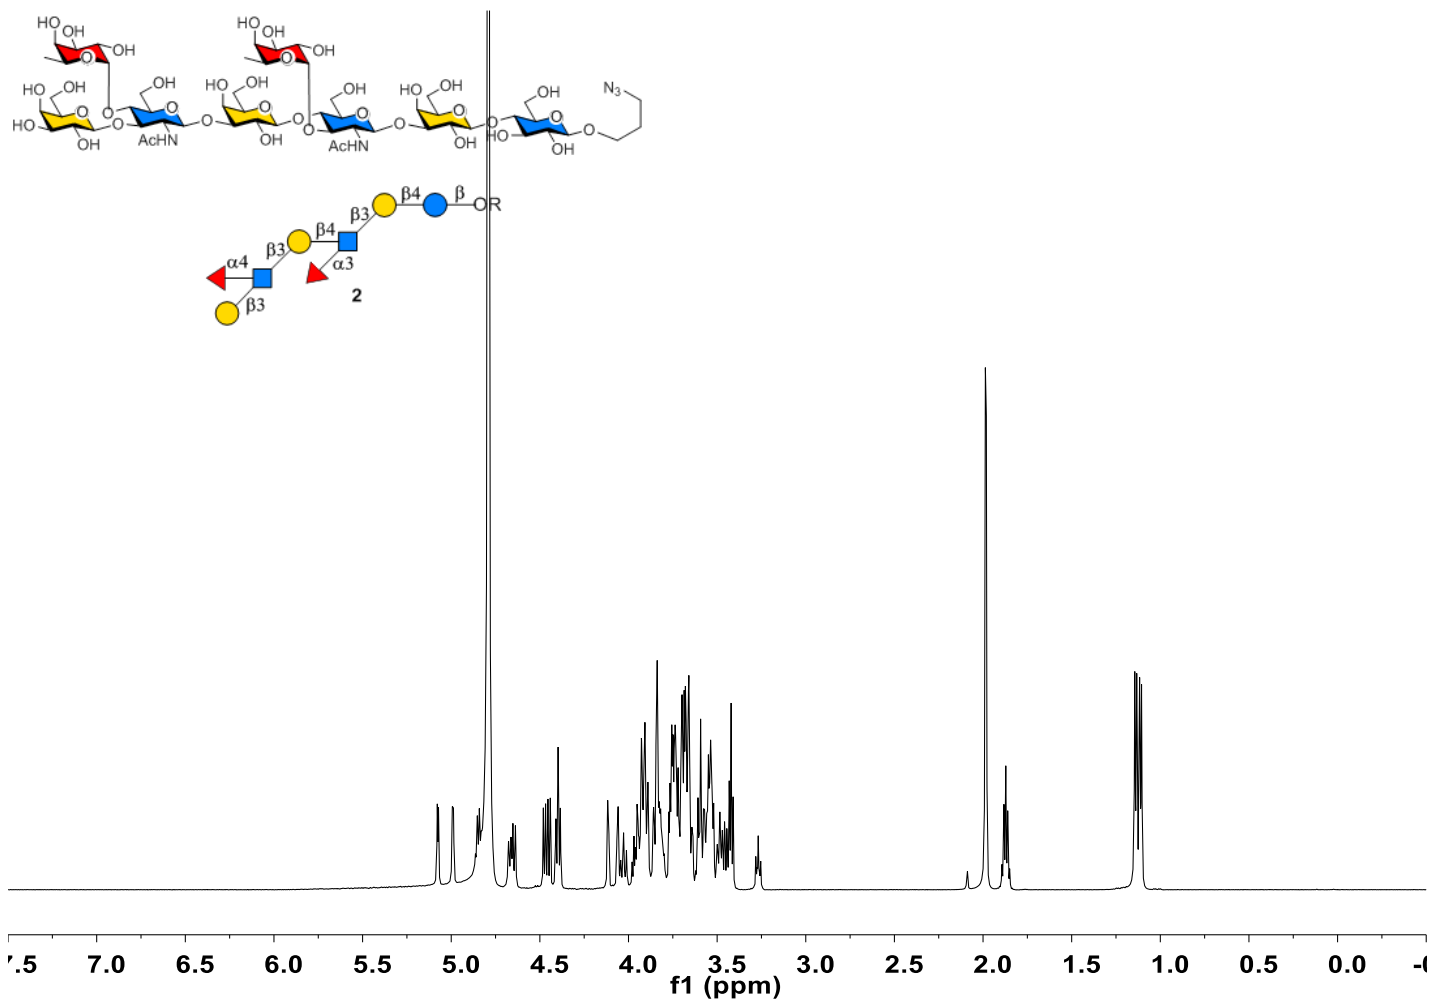

# <sup>13</sup>C NMR of compound 2

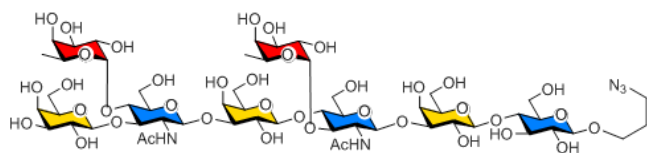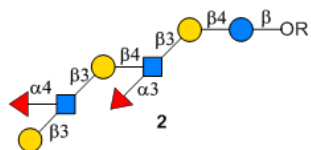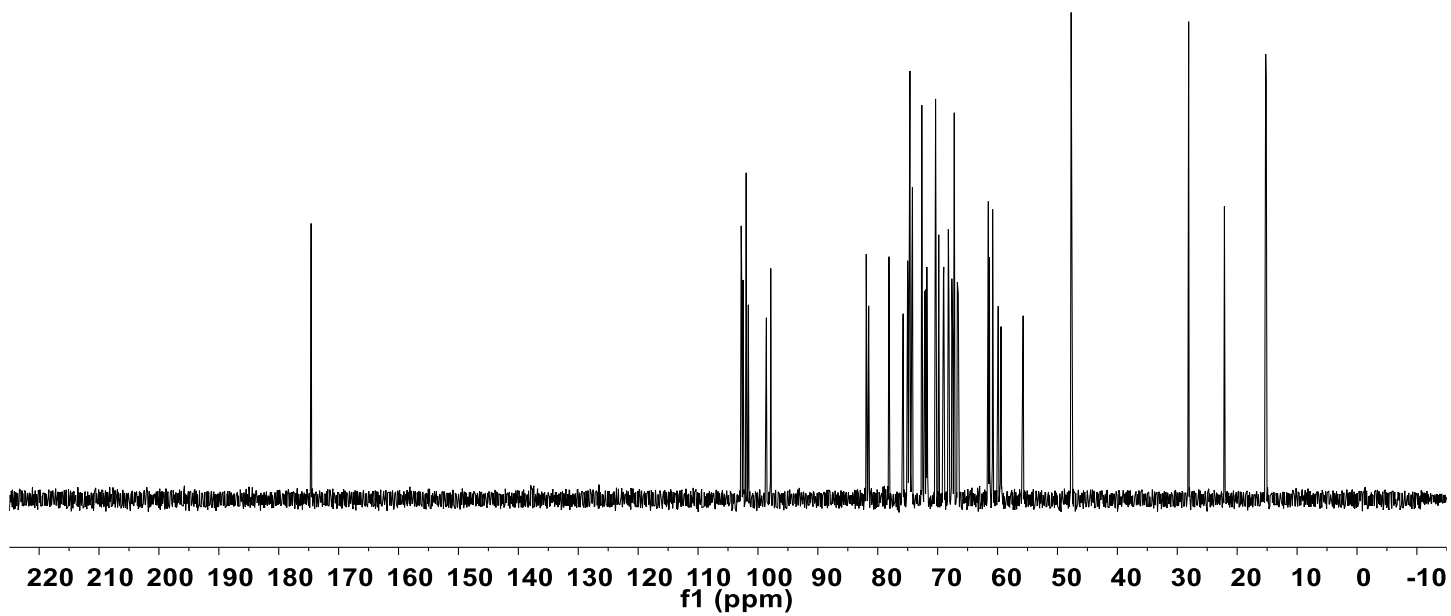

# COSY NMR of compound 2

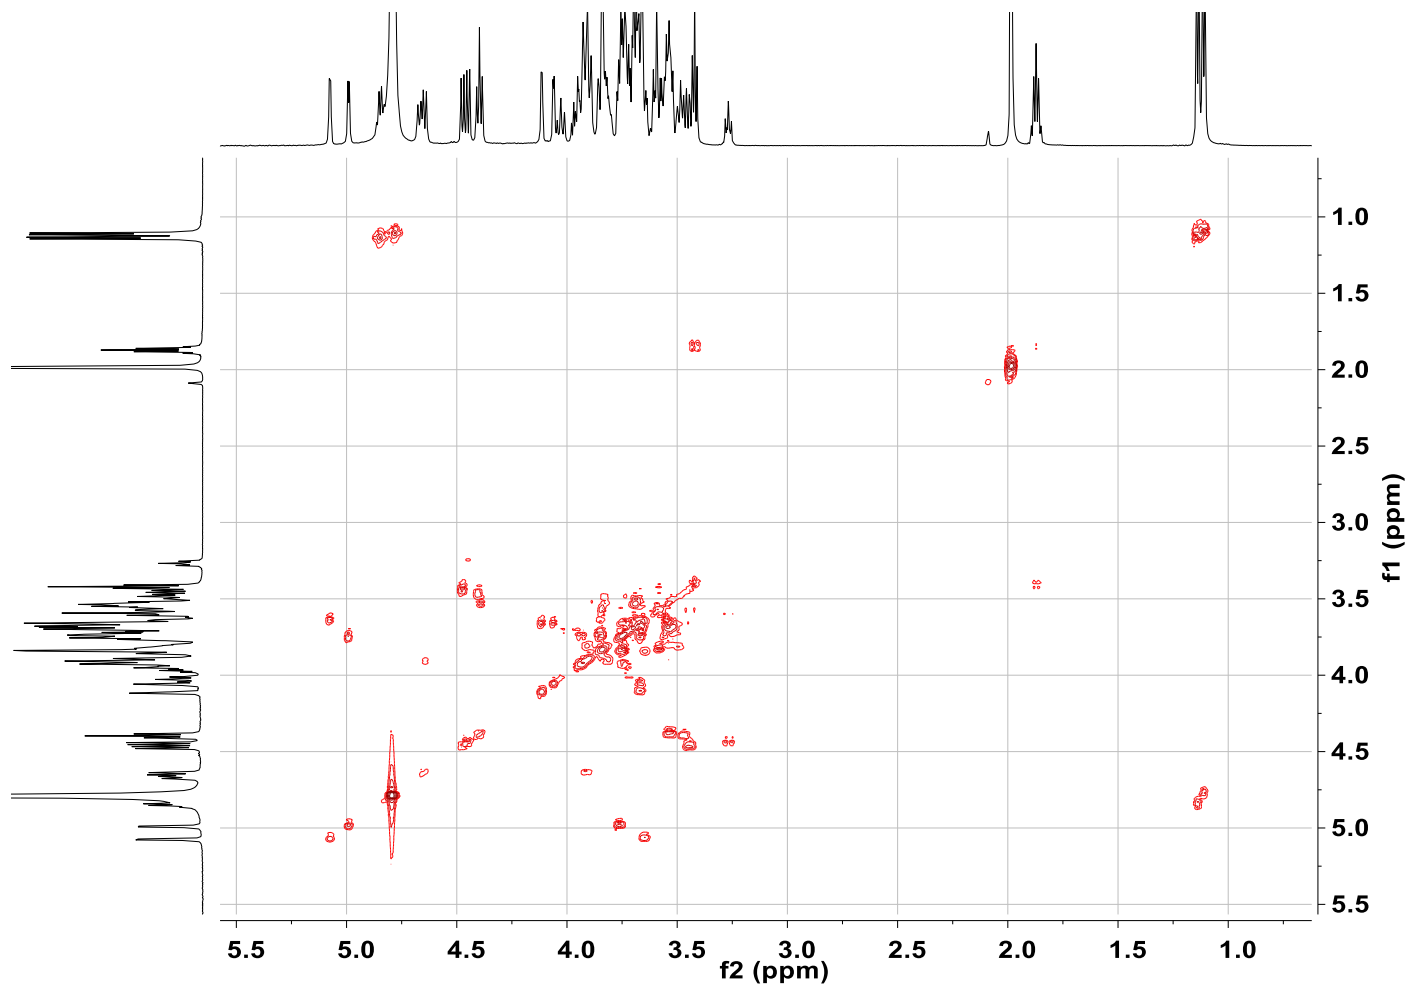

# HSQC NMR of compound 2

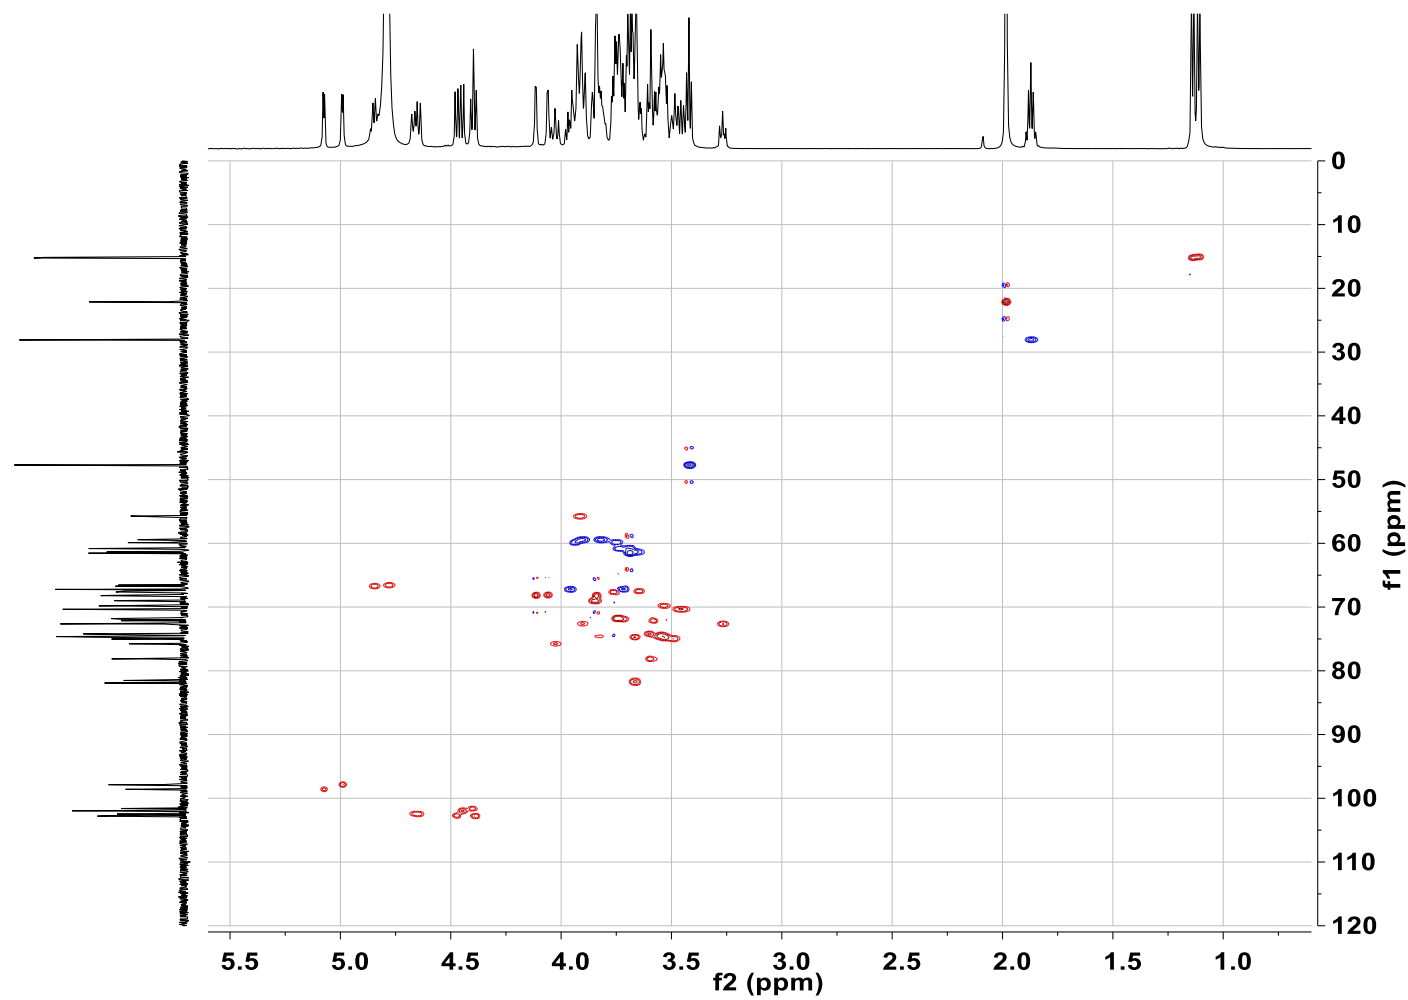

# HMBC NMR of compound 2

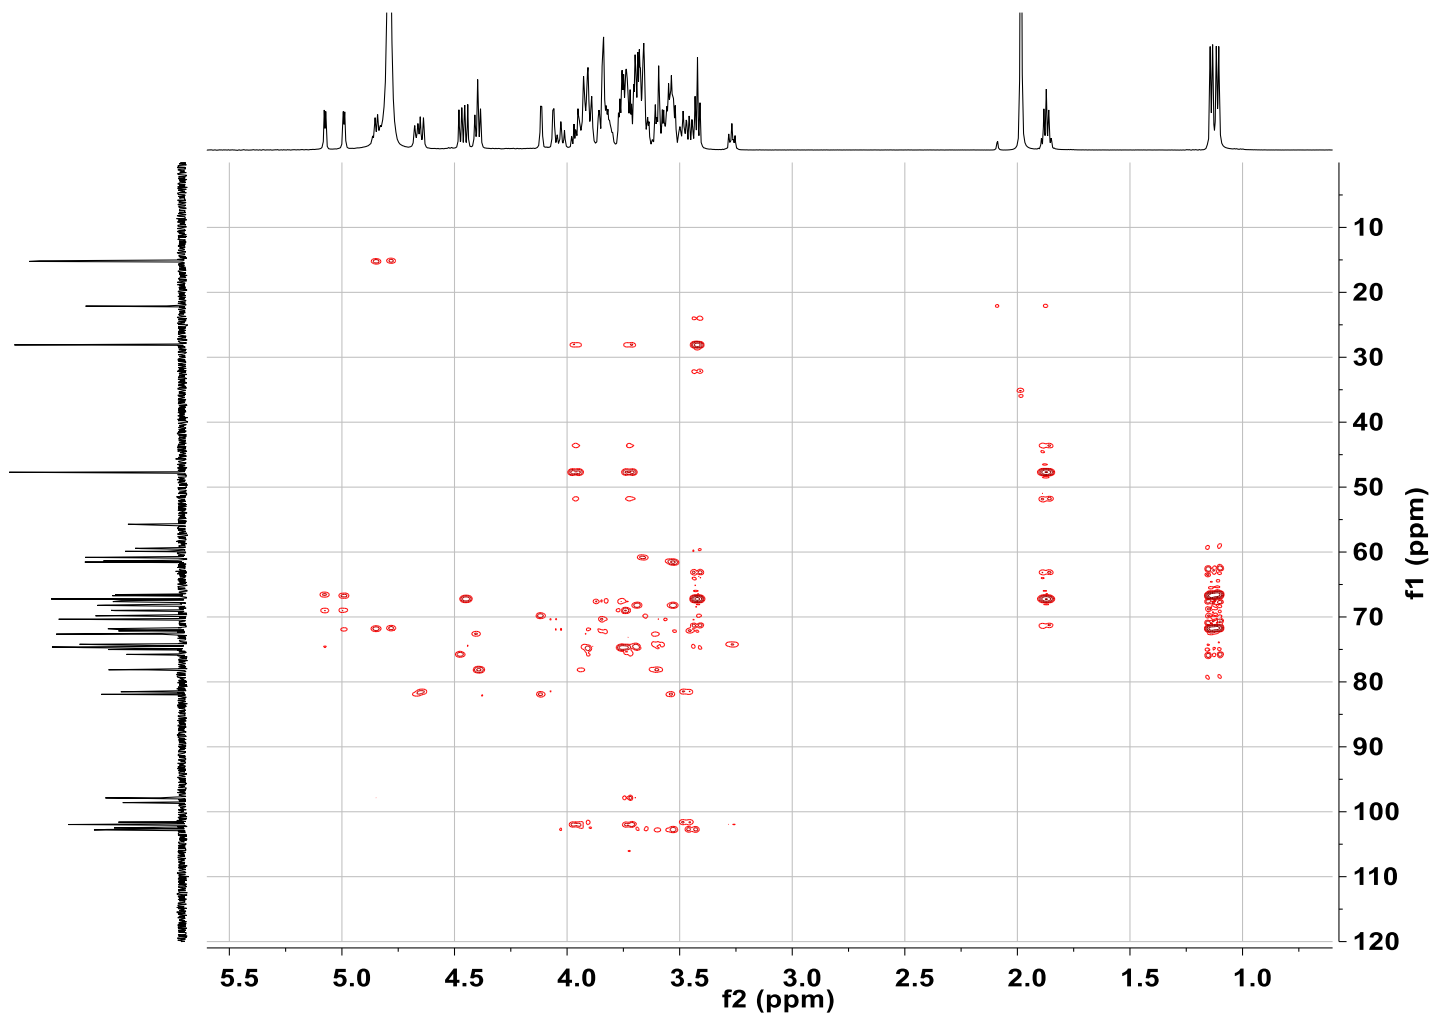

# HSQC-TOCSY NMR of compound 2

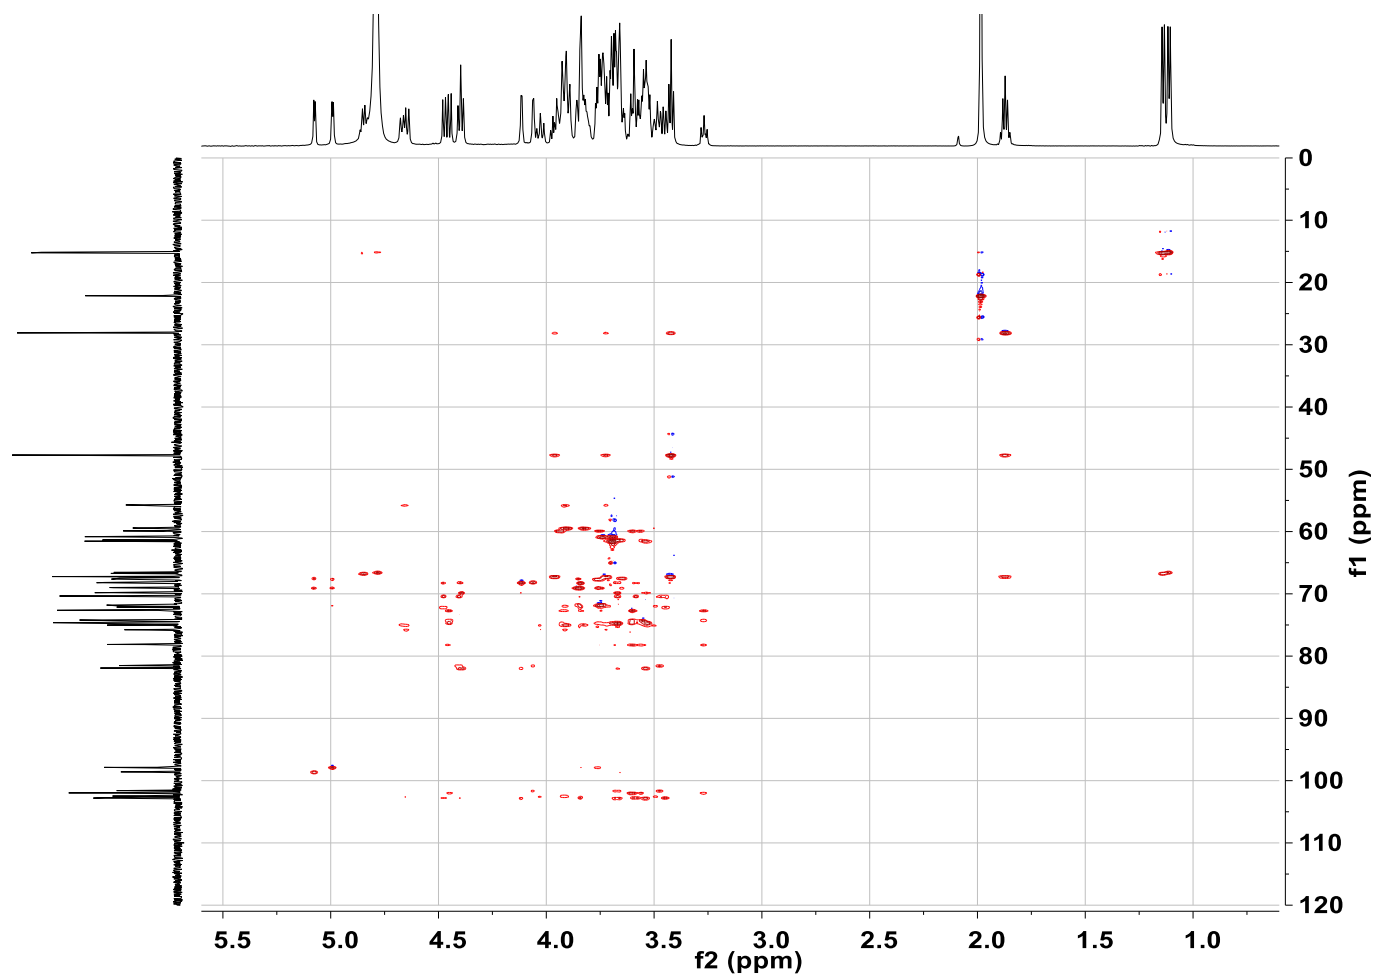



# <sup>1</sup>H NMR of compound 3

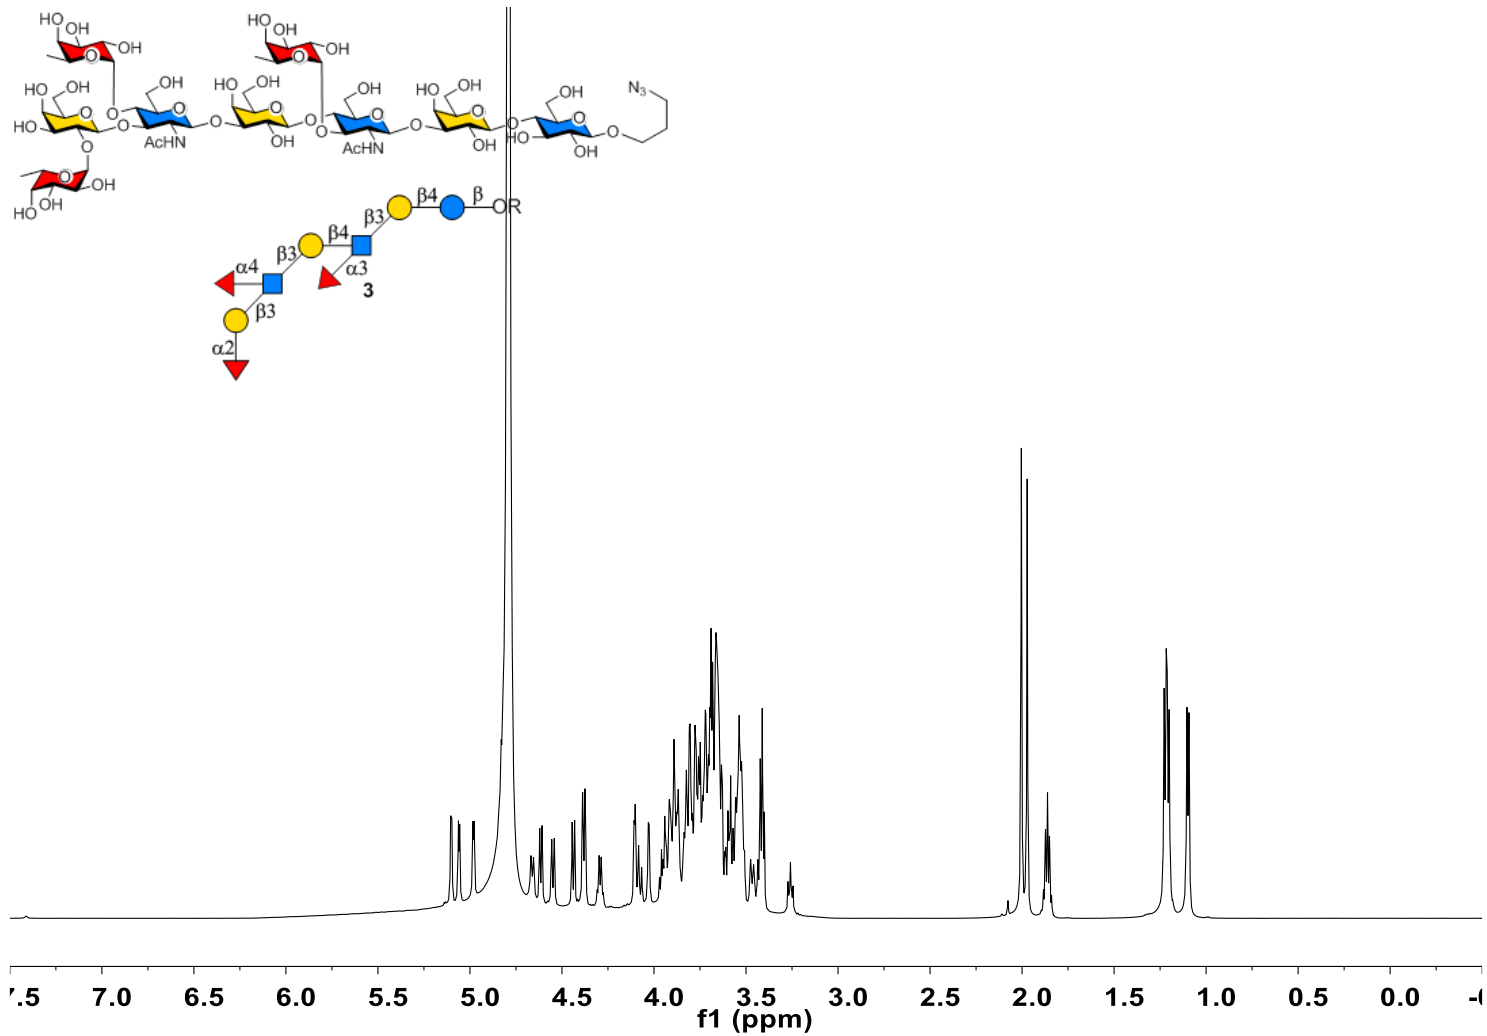

# <sup>13</sup>C NMR of compound 3

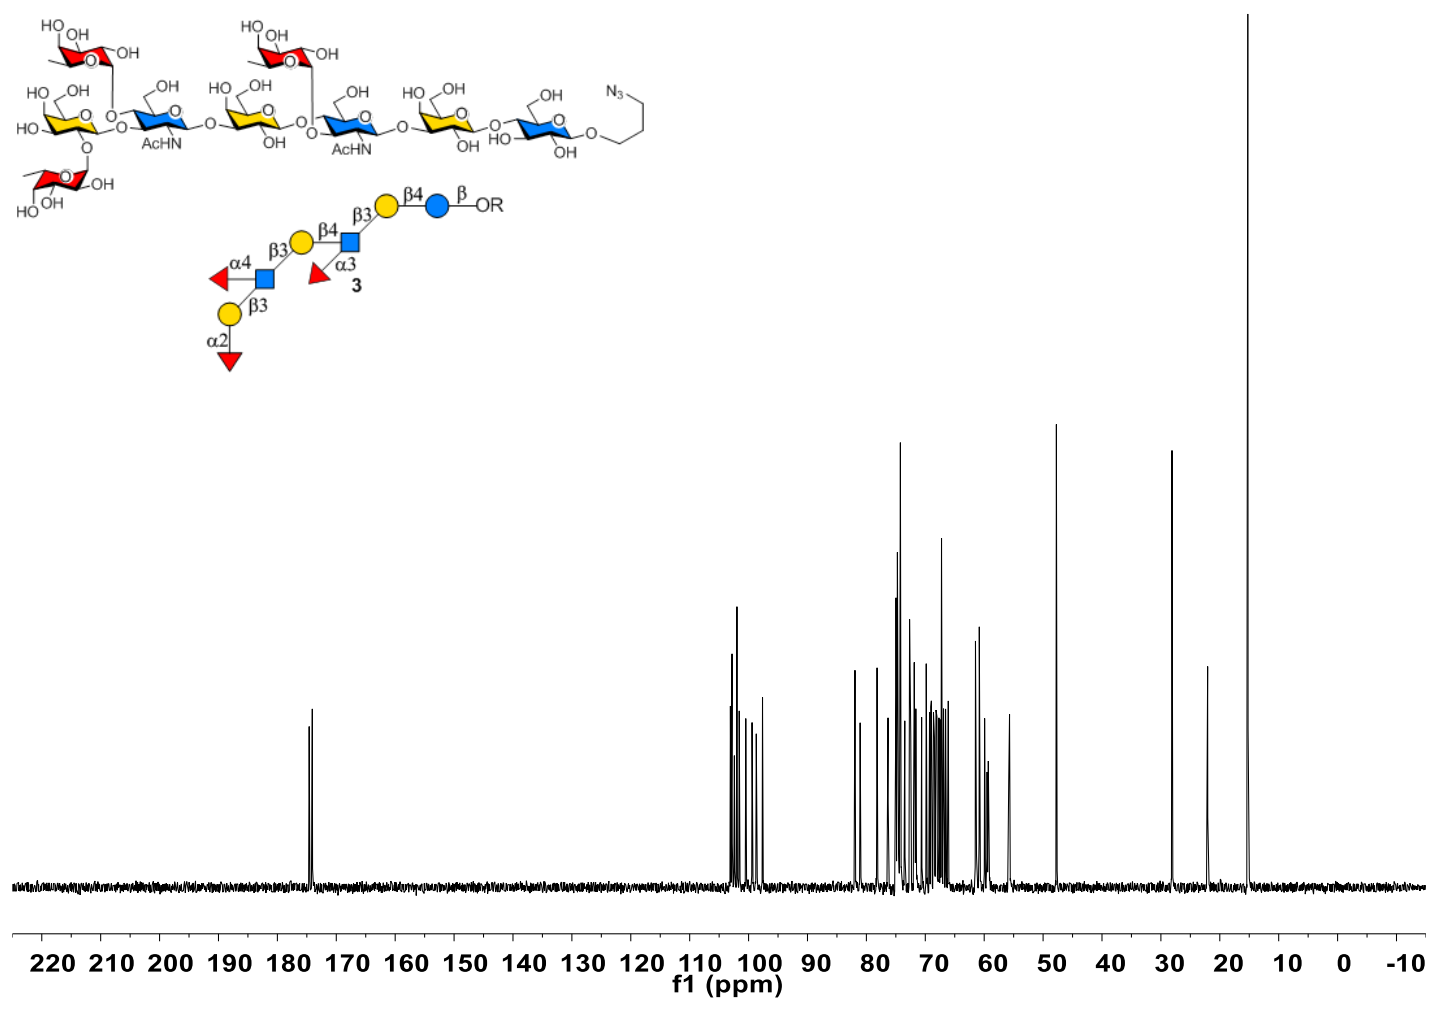

**COSY NMR of compound 3**

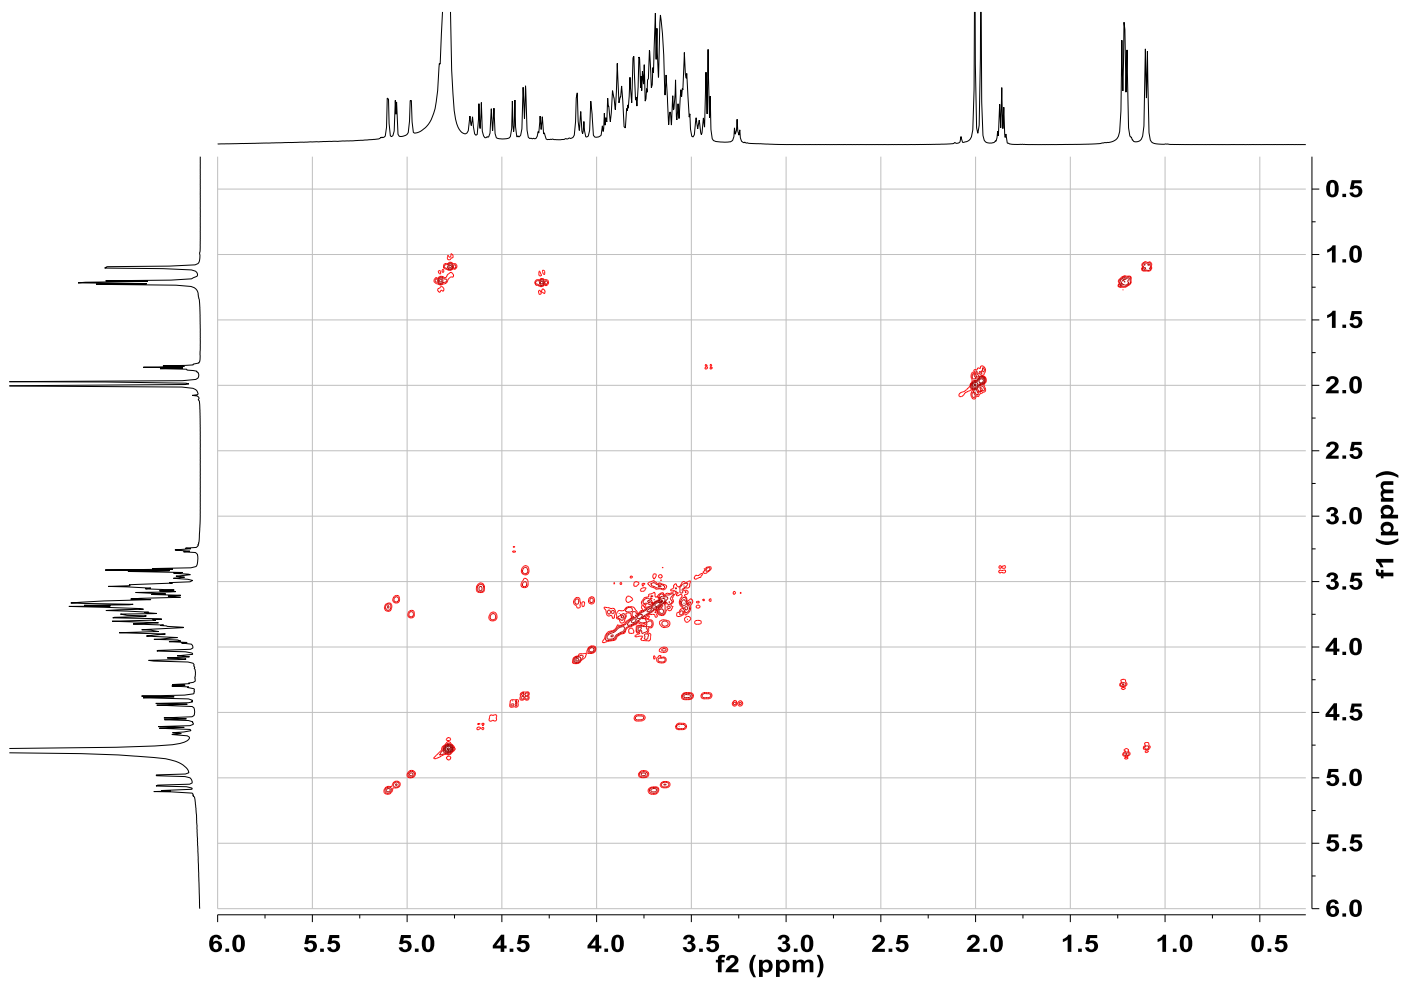

HSQC NMR of compound 3

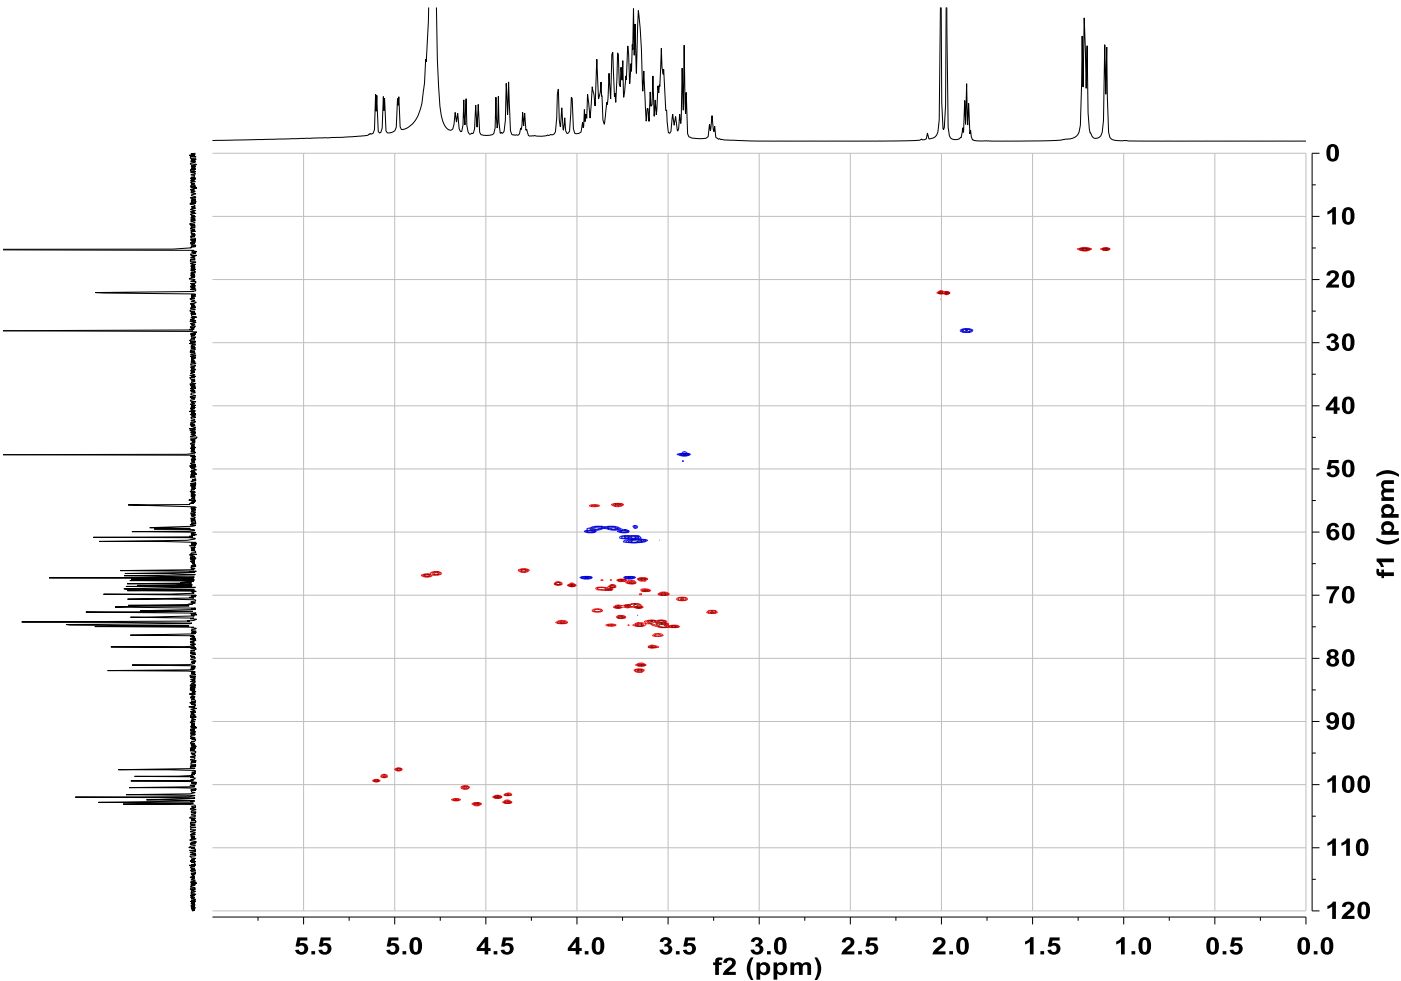

HMBC NMR of compound 3

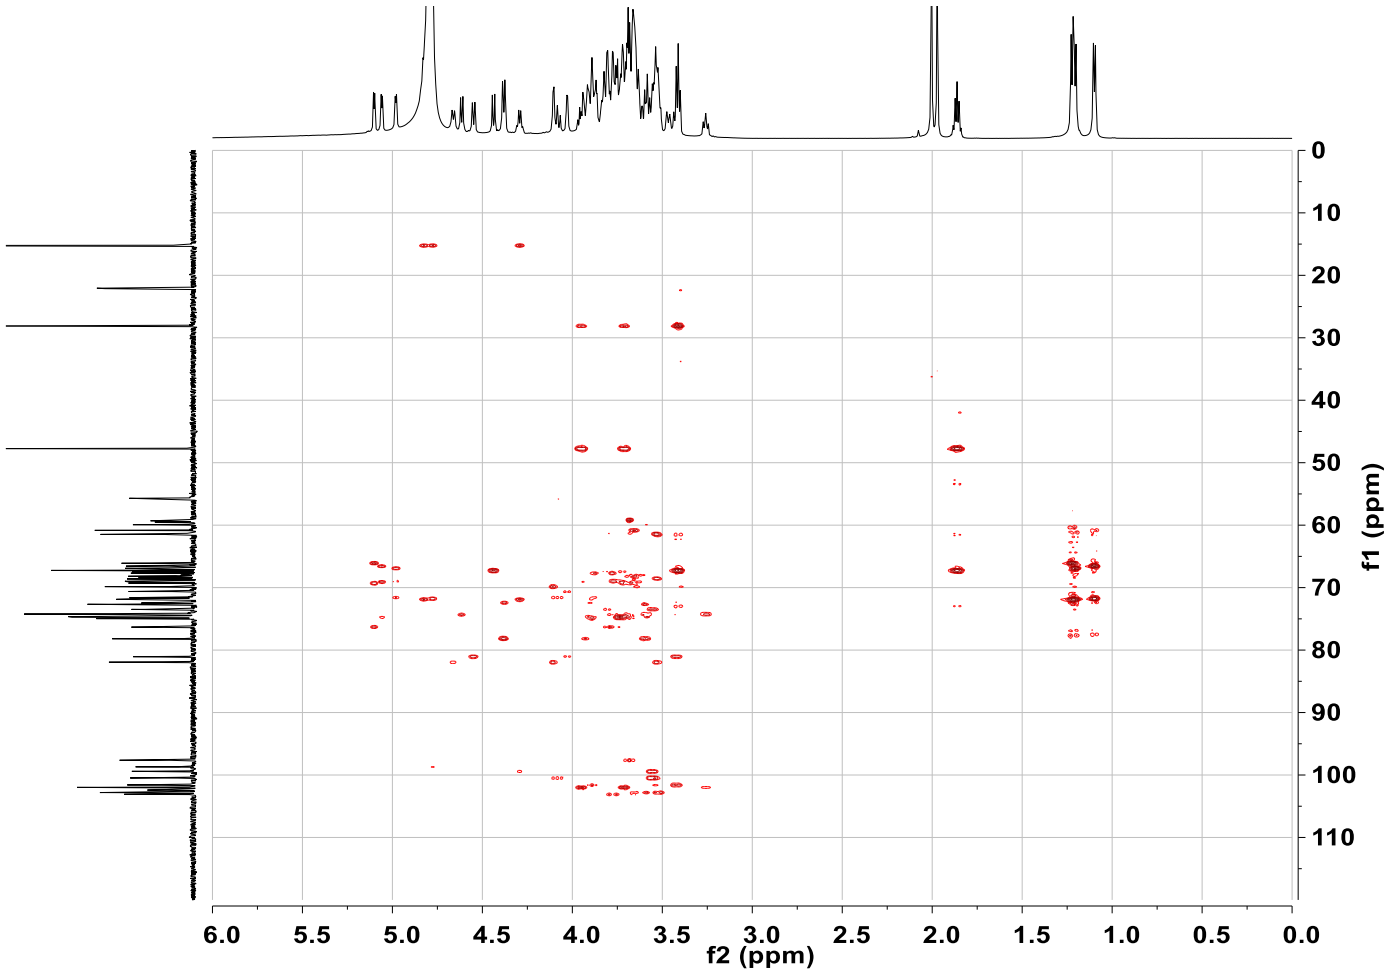

HSQC-TOCSY NMR of compound 3

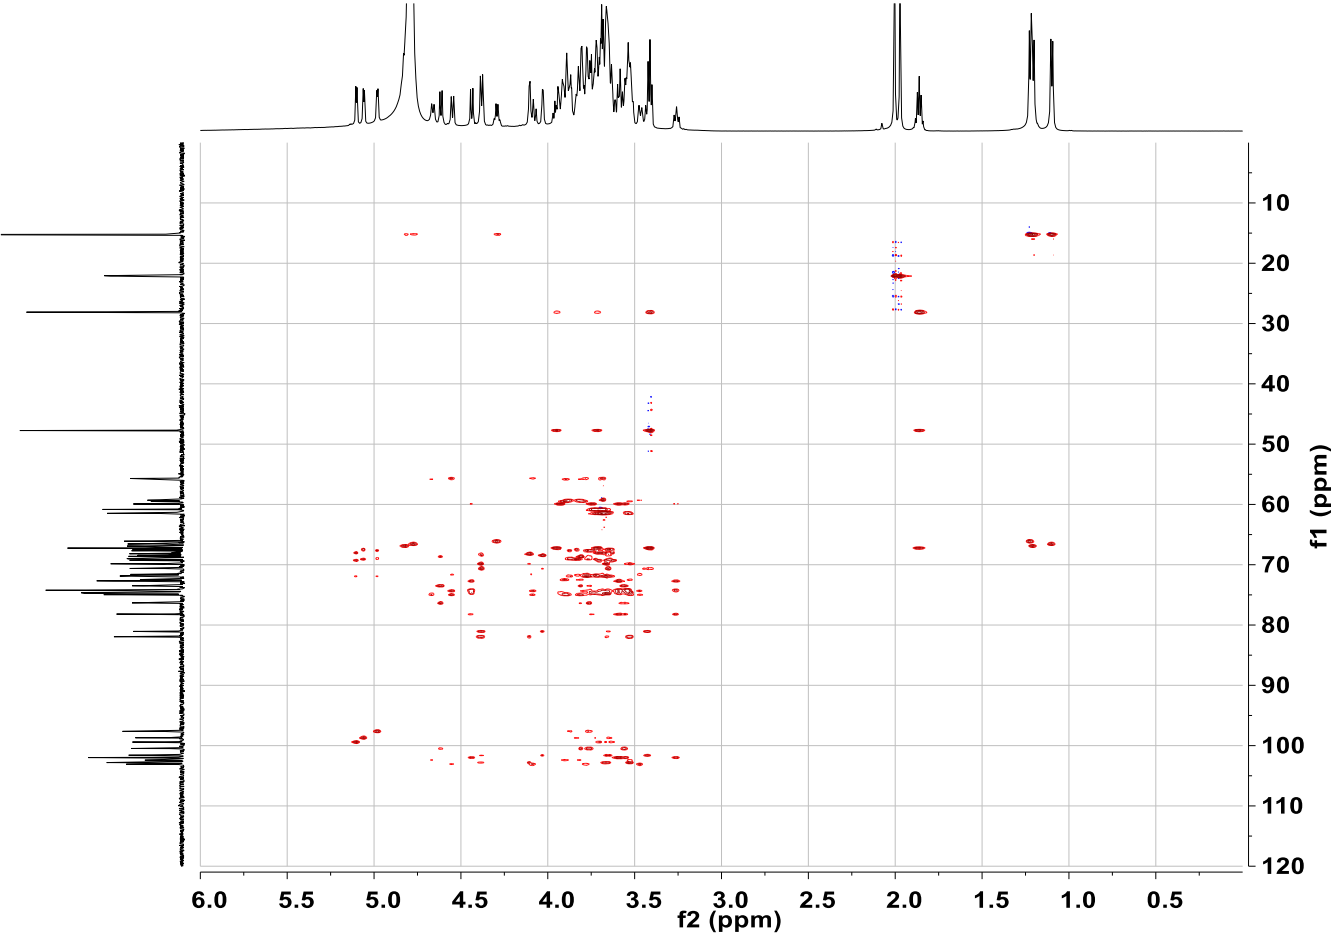

# <sup>1</sup>H NMR of compound 8

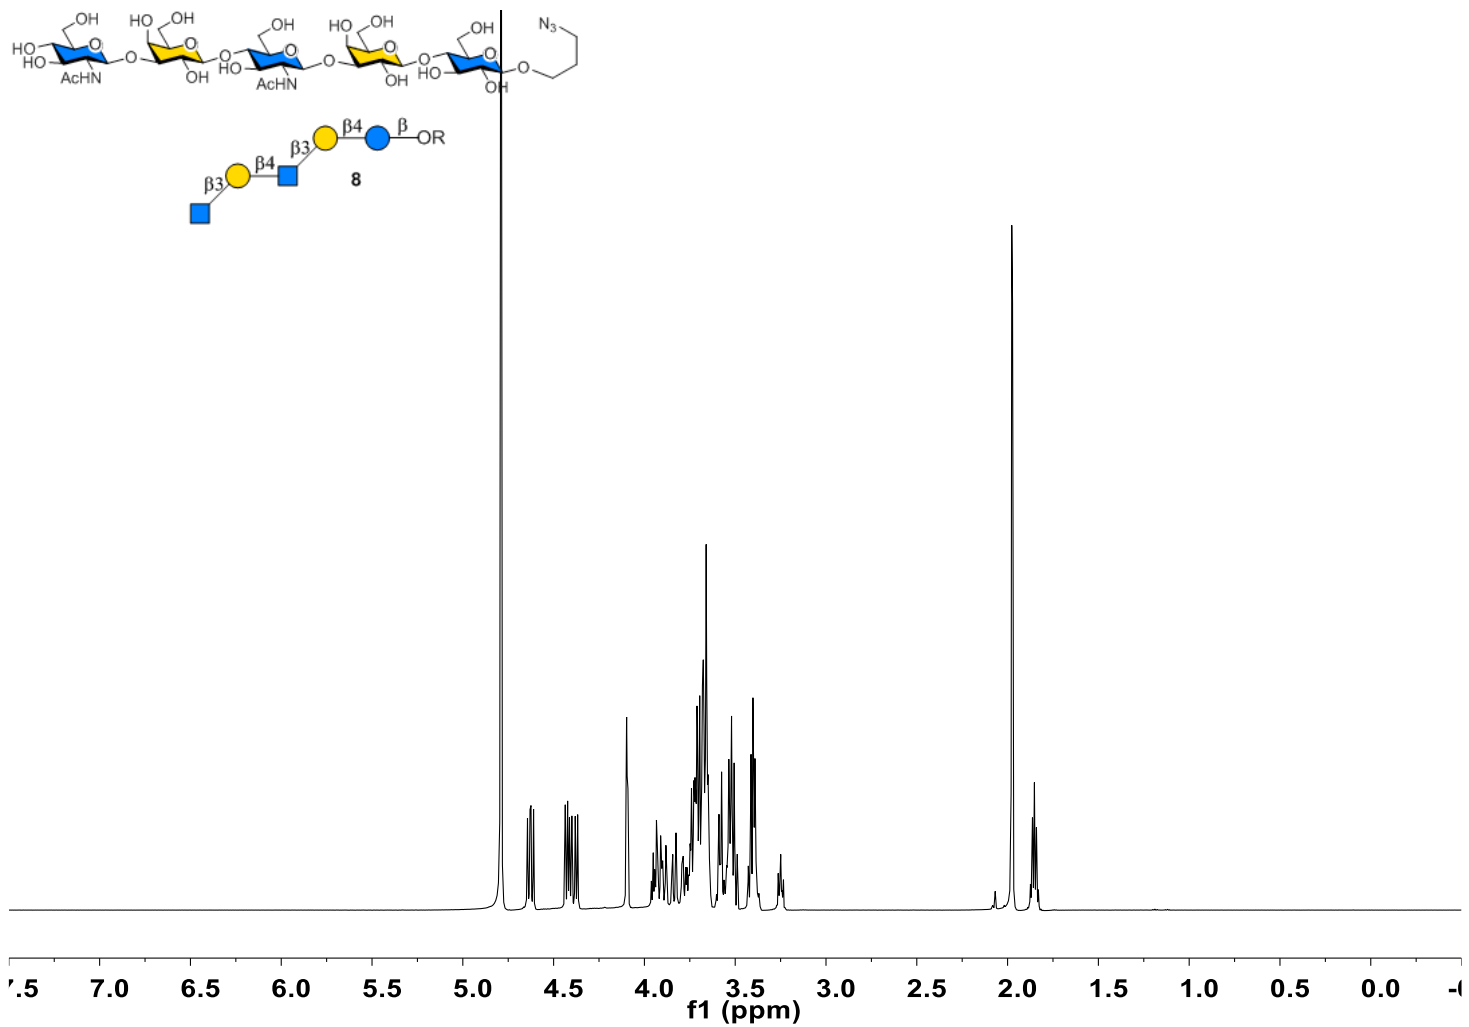

**<sup>13</sup>C NMR of compound 8**

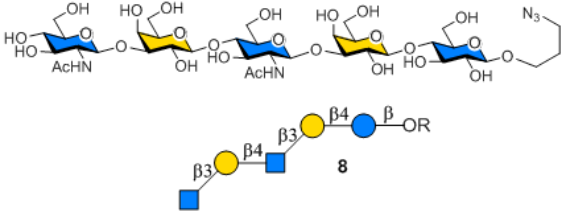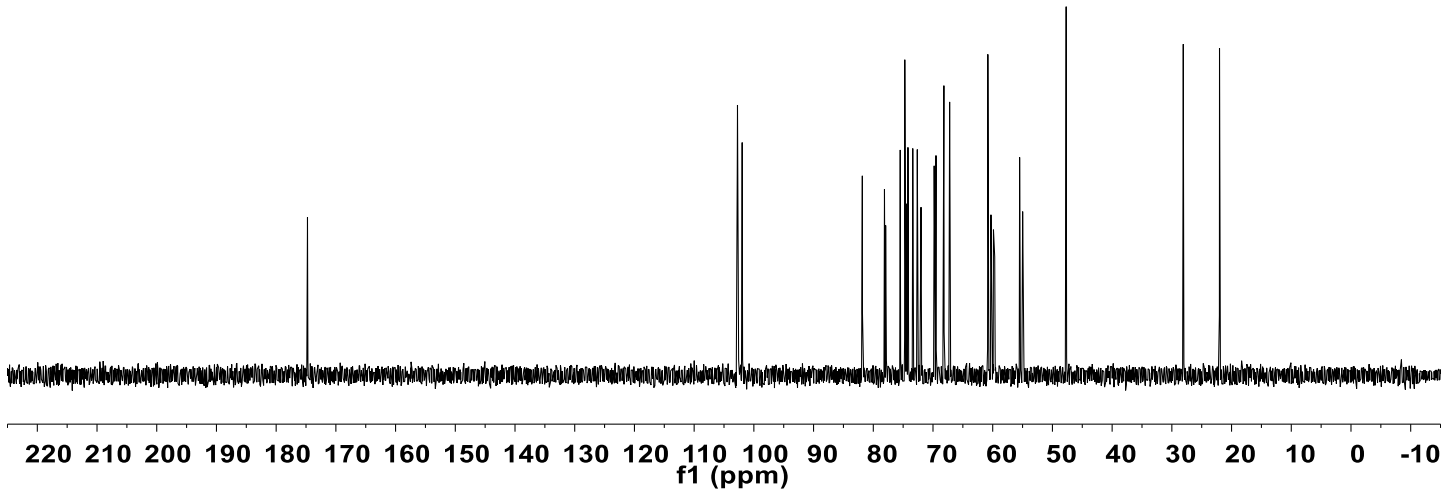



# <sup>1</sup>H NMR of compound 7

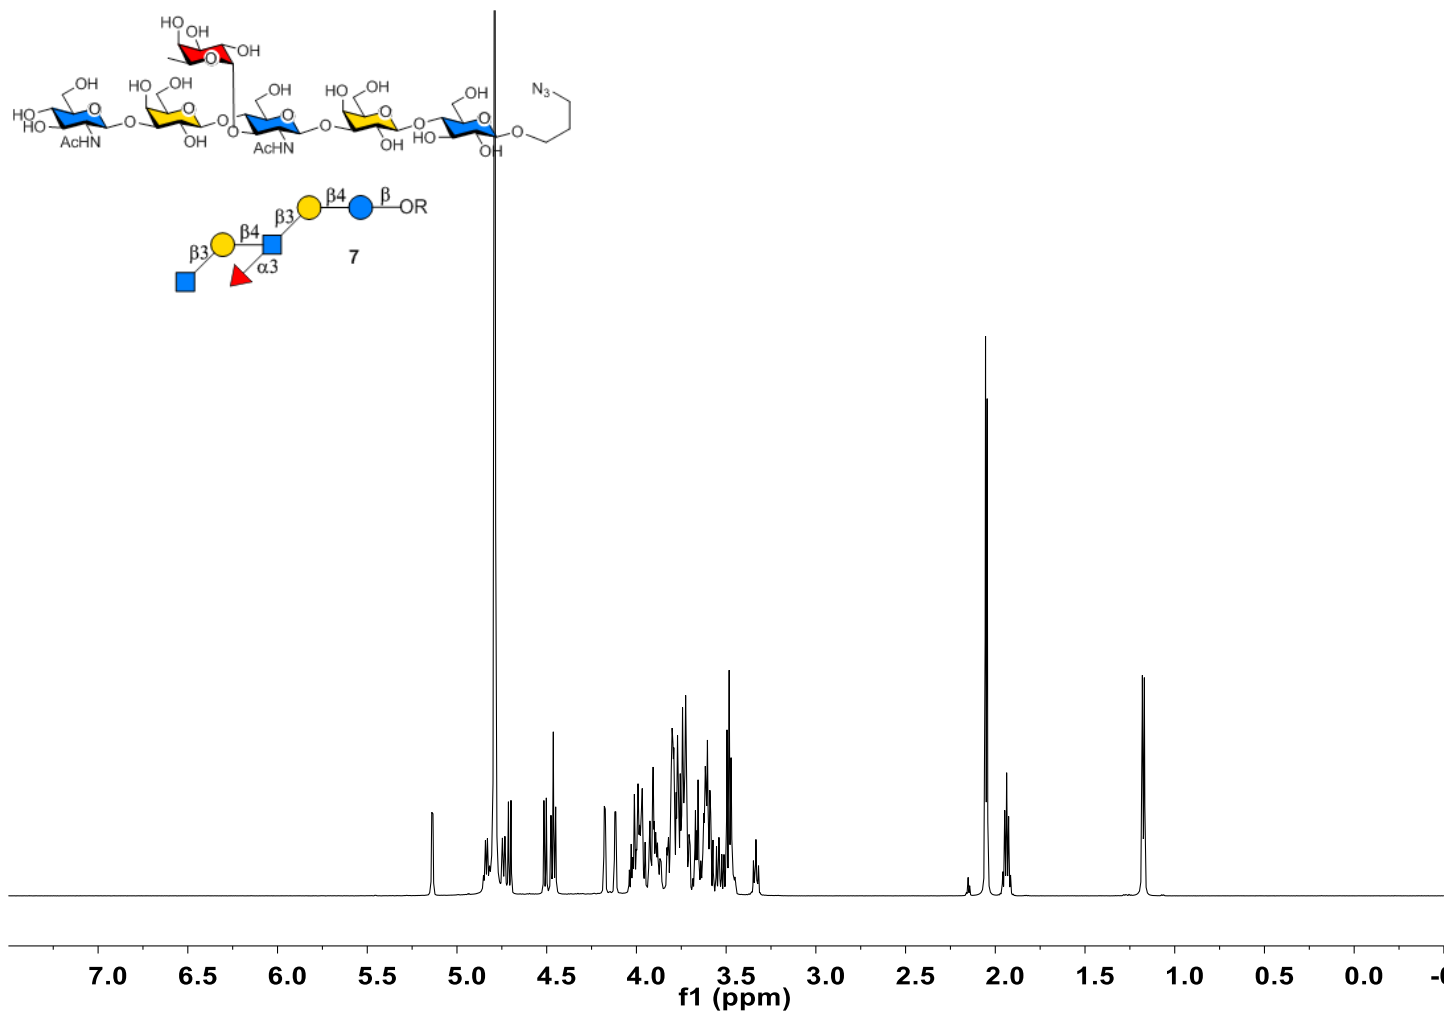

# $^{13}\text{C}$ NMR of compound 7

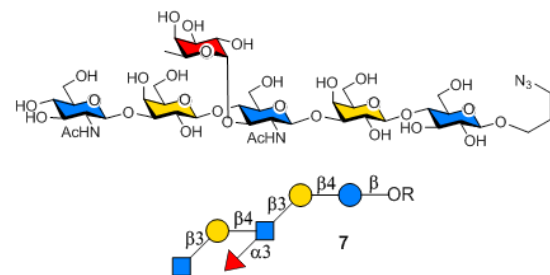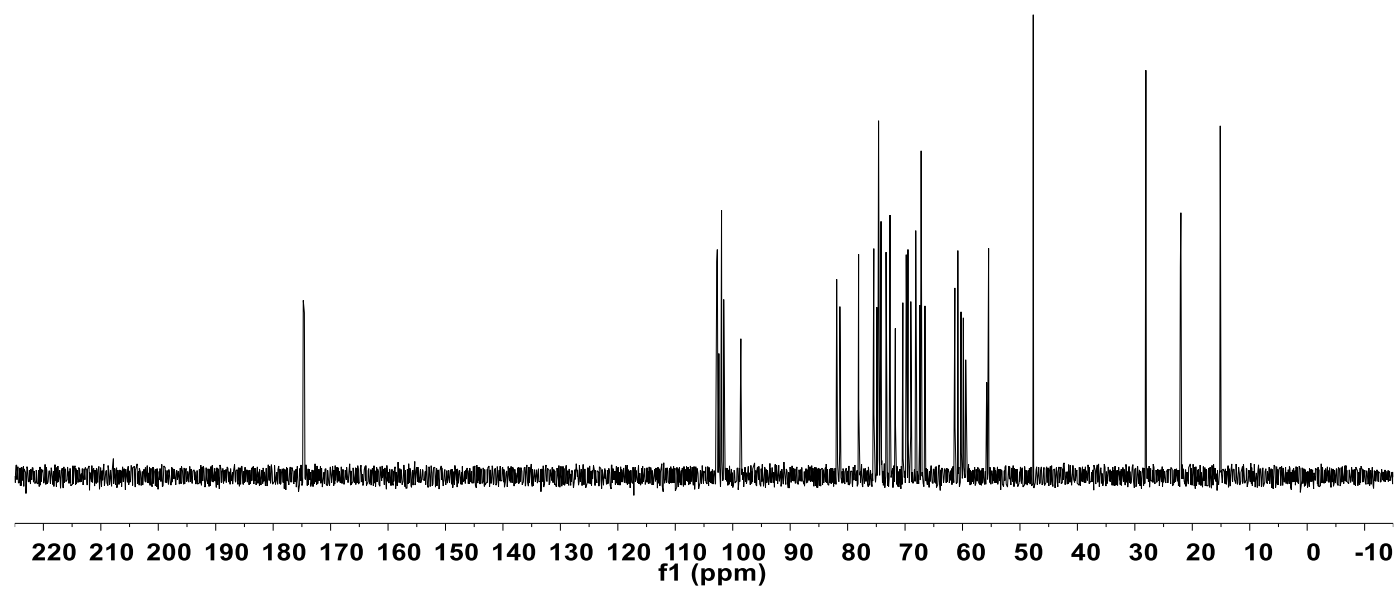

# <sup>1</sup>H NMR of compound 6

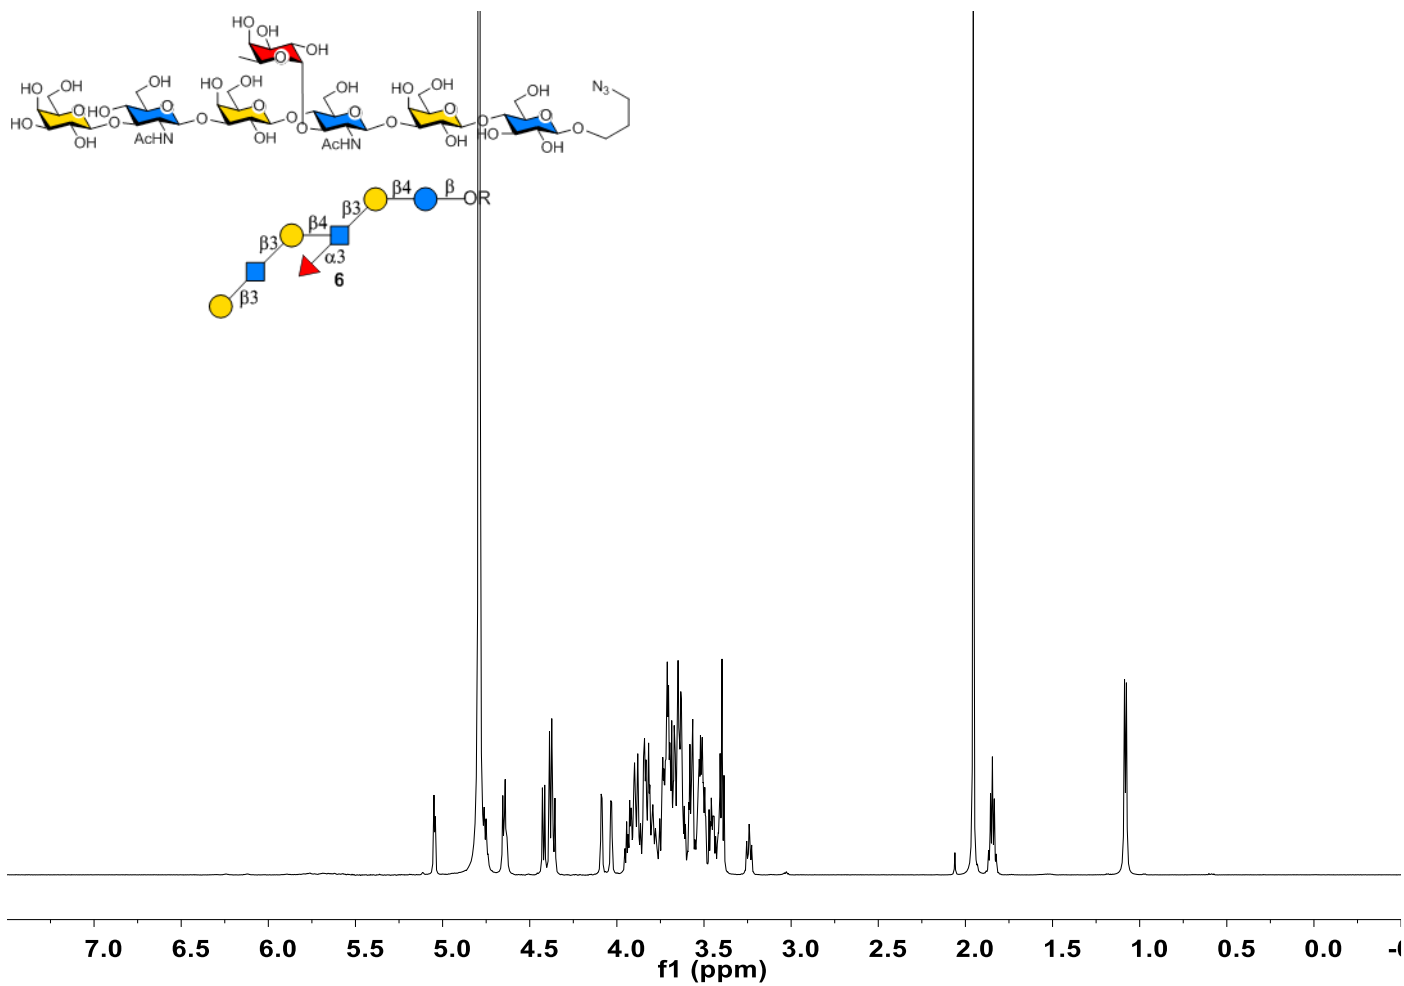

# <sup>13</sup>C NMR of compound 6

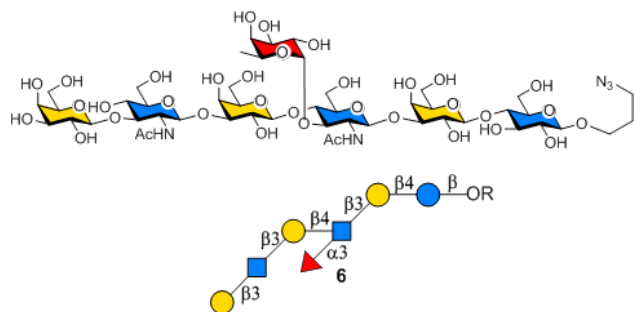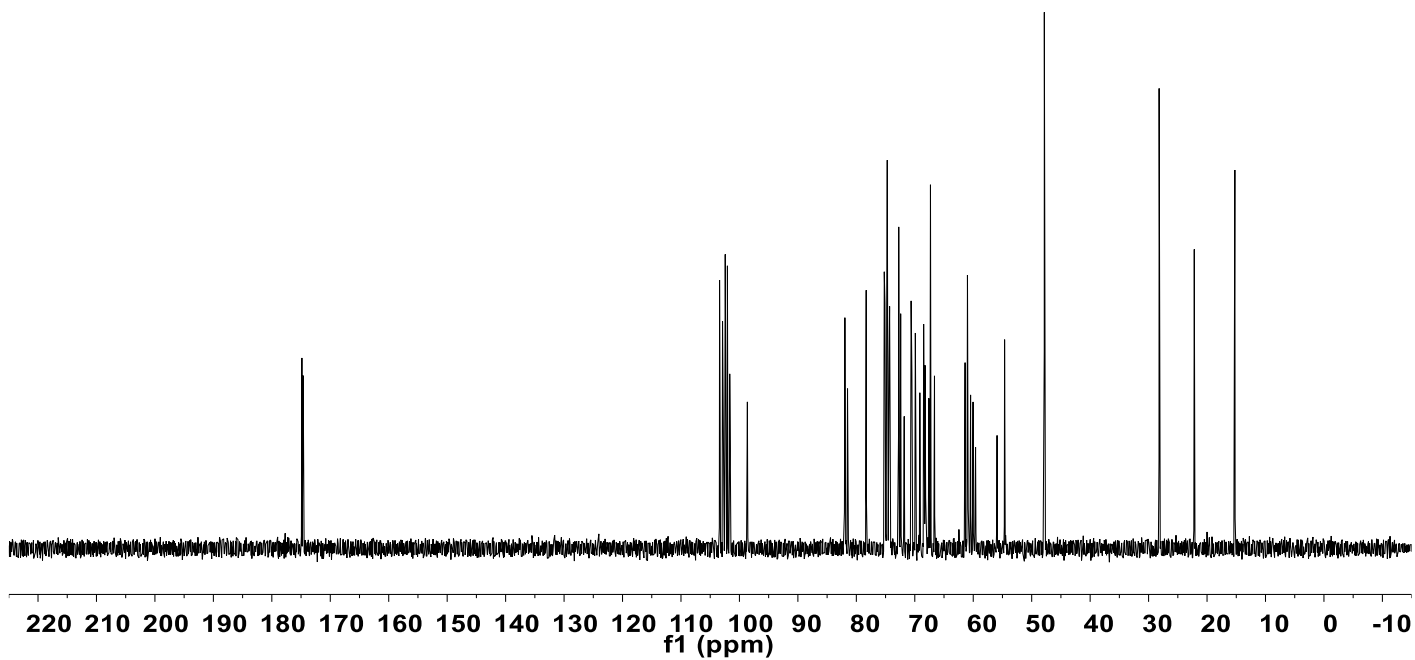

# <sup>1</sup>H NMR of compound 5

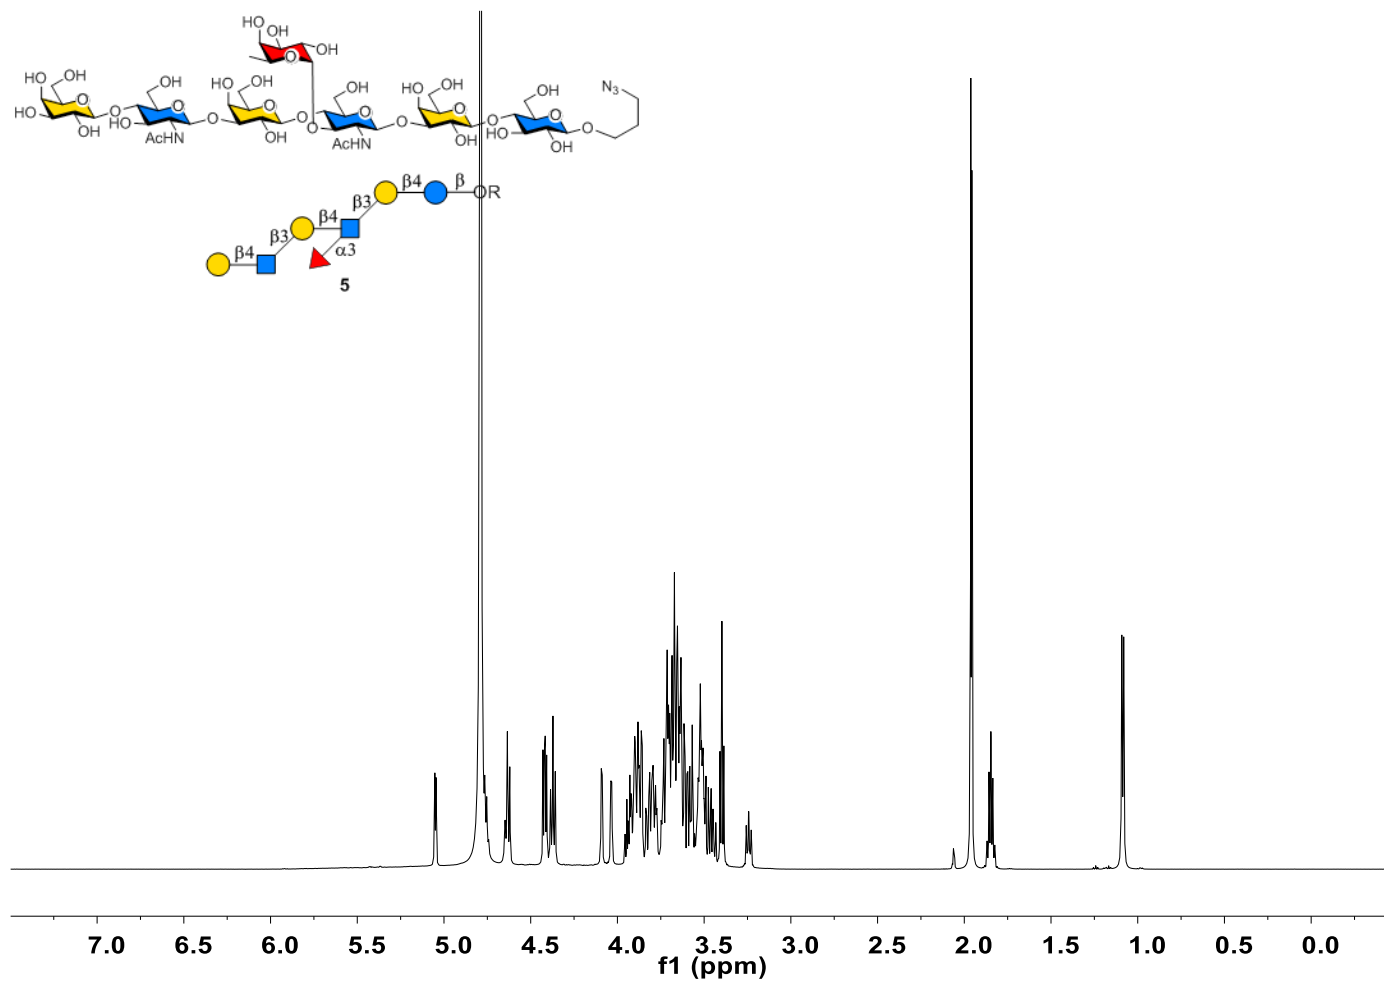

# <sup>13</sup>C NMR of compound 5

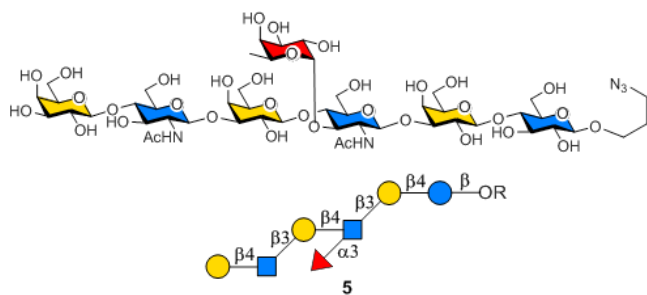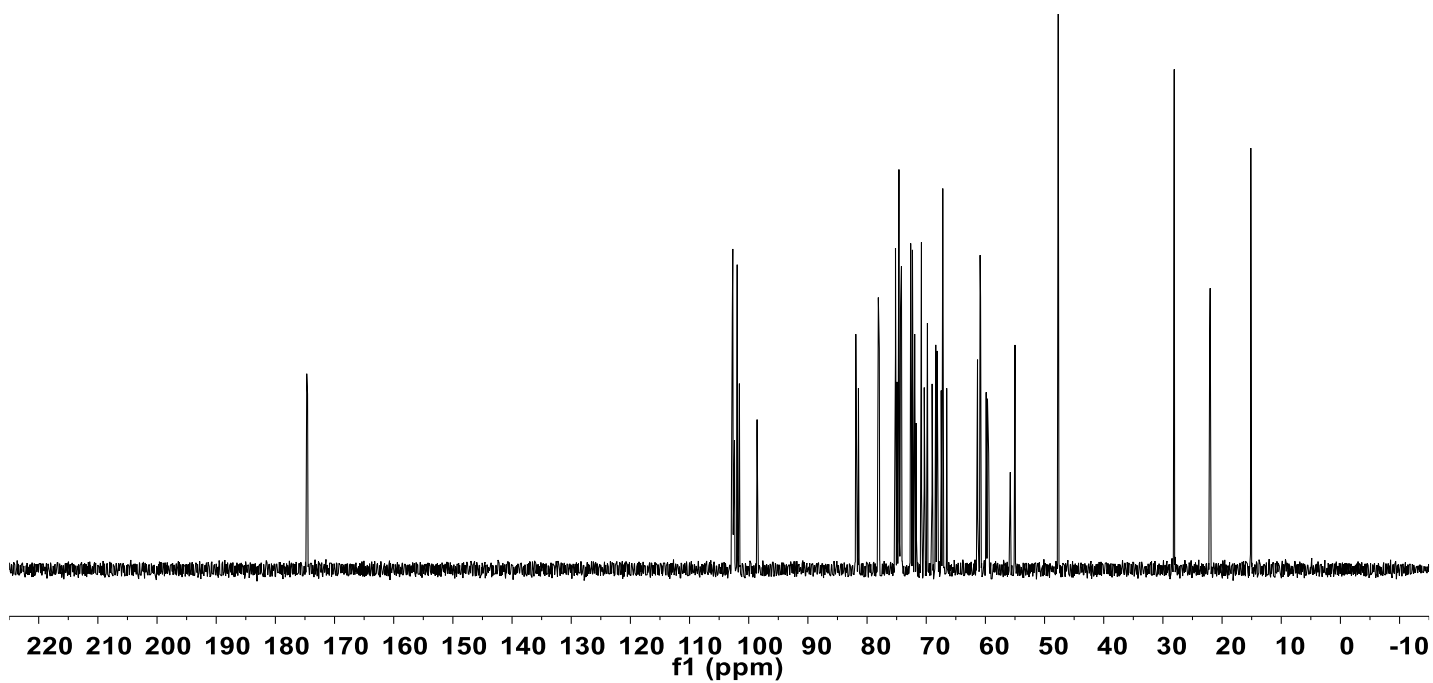

# <sup>1</sup>H NMR of compound 4

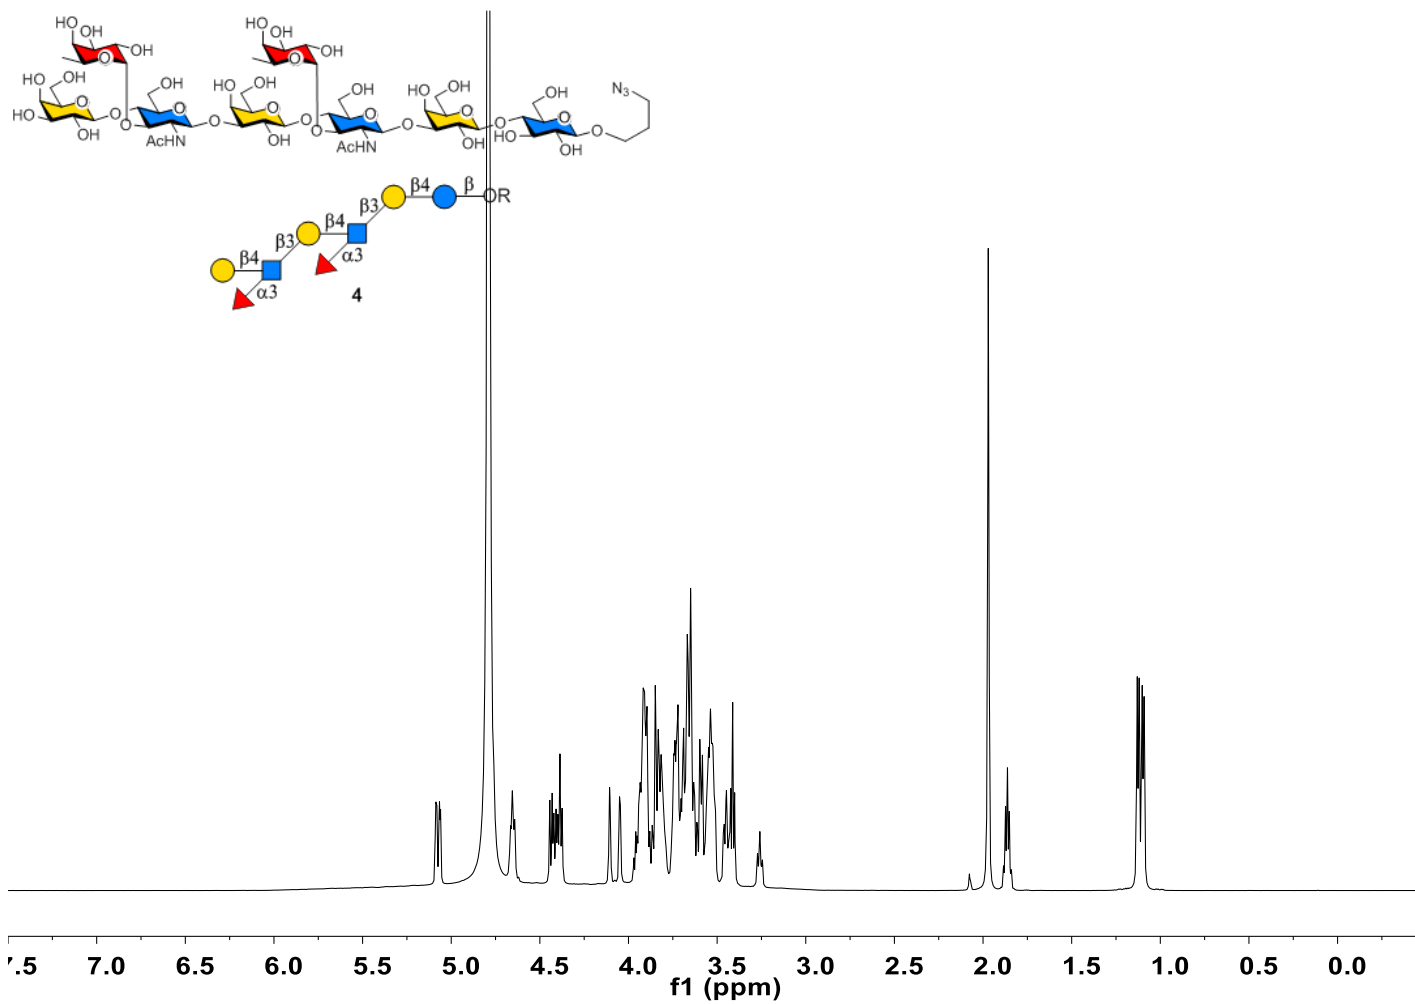

# $^{13}\text{C}$ NMR of compound 4

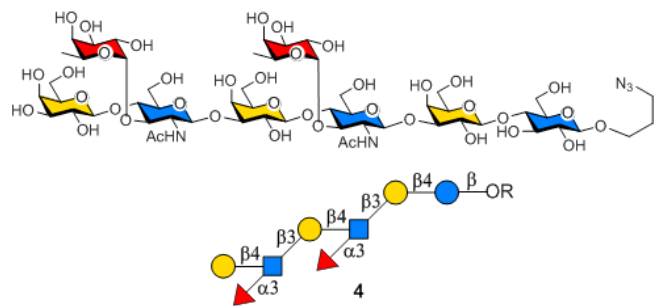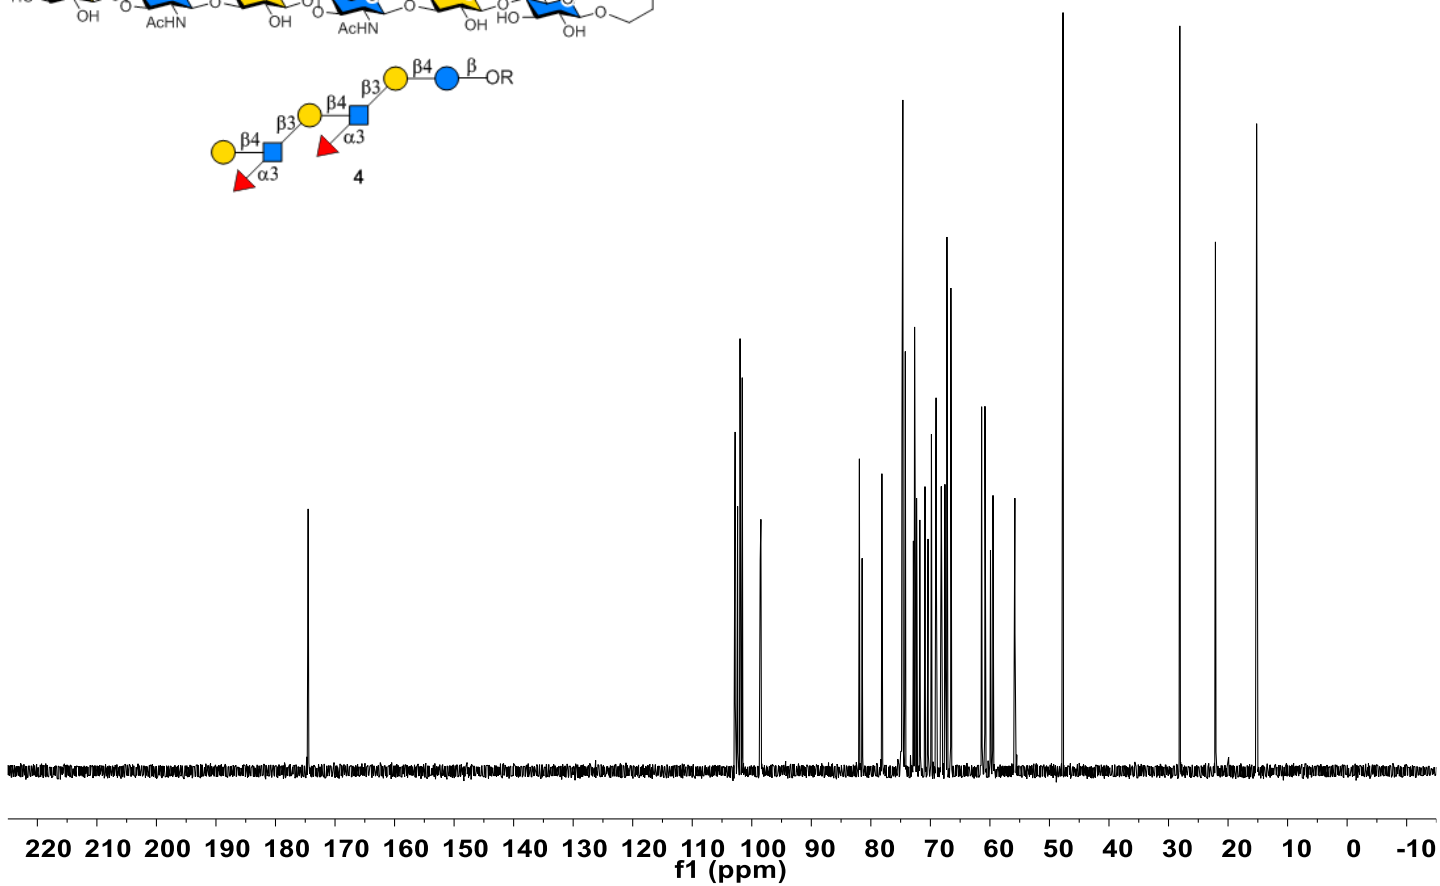

Supplement: d1ob01579f1.pdf [file d1ob01579f1.pdf]
